# Supplementary material
Source: PubMed Central journal article supplement (PMC2535796)
Supplement: NIHMS63803-supplement-1si20060501_11.pdf [file NIHMS63803-supplement-1si20060501_11.pdf]

***Supporting Information:***

**Manuscript for:** *Organic Letters*

**Draft:** May 1, 2006

**Fluorogenic Substrates for Phospholipase D and Phospholipase C**

*Tyler M. Rose and Glenn D. Prestwich\**

*Department of Medicinal Chemistry, University of Utah, 419 Wakara Way, Suite 205,  
Salt Lake City, UT 84108*

Email: Glenn.Prestwich@hsc.utah.edu

**Running Title:** Fluorogenic PLD Substrates

\*To whom correspondence should be addressed. Phone: 801-585-9051. Fax: 801-585-9053.

***Table of Contents:***

|                           |         |
|---------------------------|---------|
| Figure Legends.....       | S3      |
| Figure 2.....             | S4      |
| Figure 3.....             | S5      |
| Figure 4.....             | S6      |
| Experimental Methods..... | S7-S14  |
| NMR Spectra.....          | S14-S37 |

## Figure Legends

**Figure 2.** Fluorescence evolution ( $\lambda_{\text{Ex}}/\lambda_{\text{Em}} = 500/530$  nm) during 3 min incubation of **lysoDDPB** mixed micelles with PLD from various sources

**Figure 3.** Fluorescence evolution ( $\lambda_{\text{Ex}}/\lambda_{\text{Em}} = 500/530$  nm) during 60 min incubation of **lysoDDPB** mixed micelles with PLD and PLA<sub>2</sub> from various sources

**Figure 4.** Changes in fluorescence of FS-3 ( $\lambda_{\text{Ex}}/\lambda_{\text{Em}} = 484/520$  nm; Echelon Biosciences, Inc.), **DDPB**, or **lysoDDPB** mixed micelles ( $\lambda_{\text{Ex}}/\lambda_{\text{Em}} = 500/530$  nm) upon incubation with FBS. Inset: change in absorbance (405 nm) upon incubation of *p*NP-TMP with FBS.

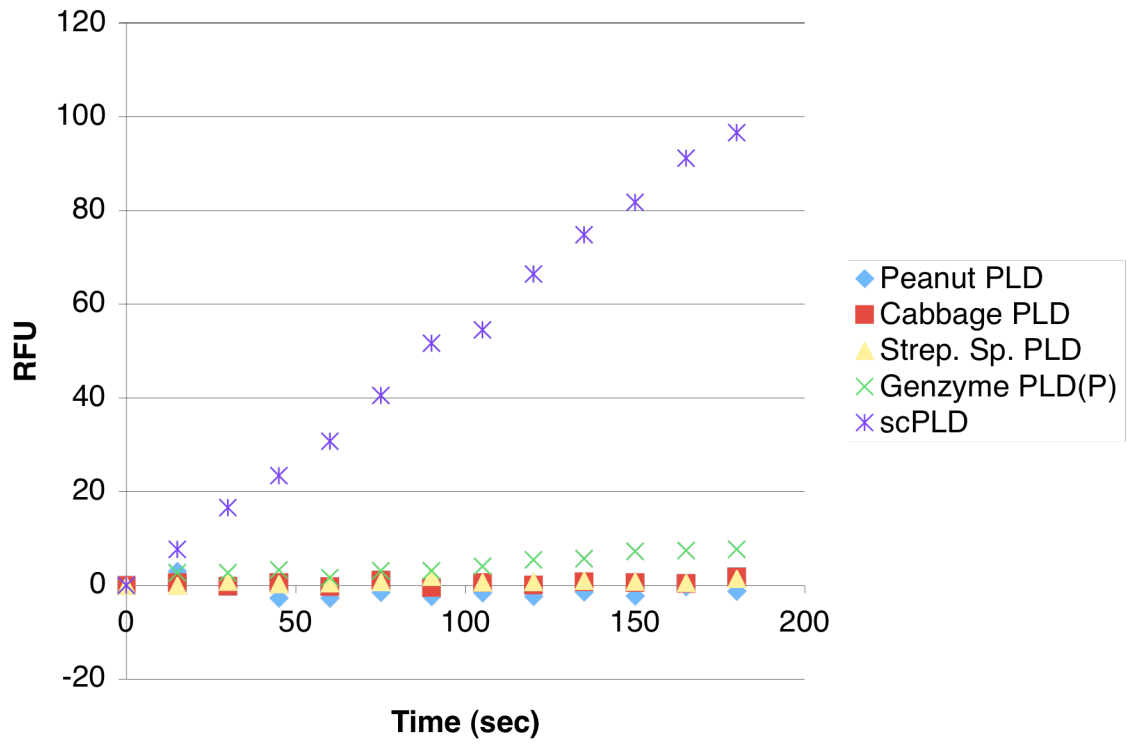

**Figure 2**

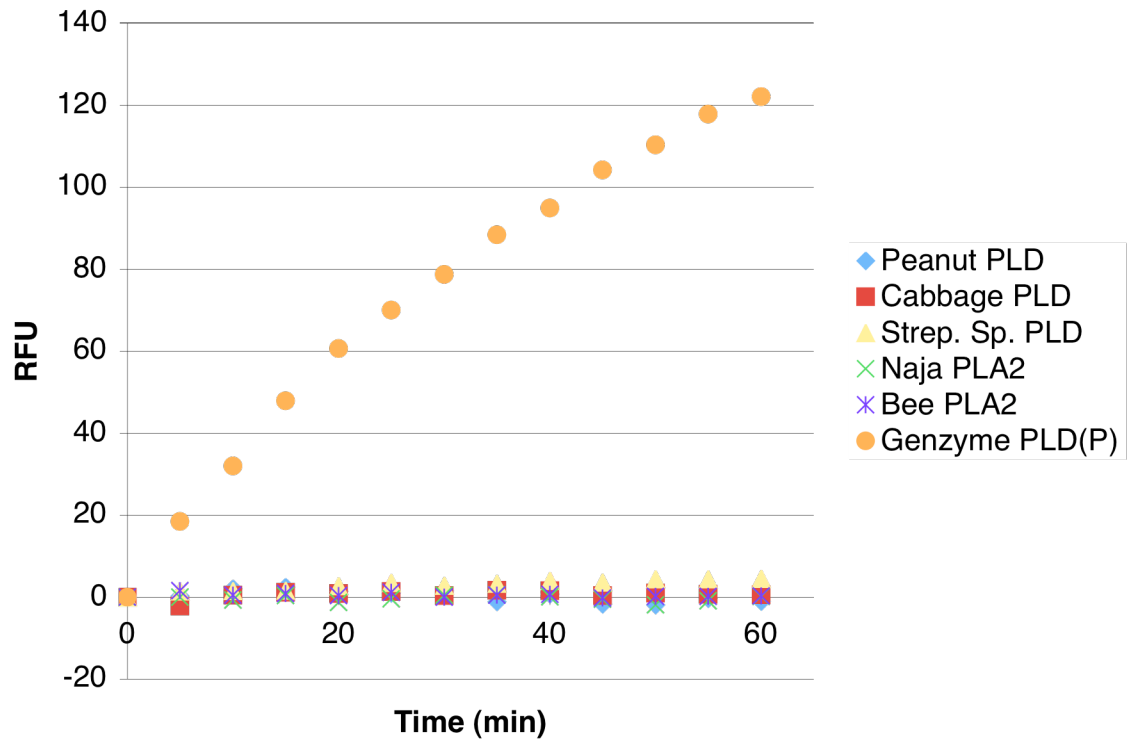

**Figure 3**

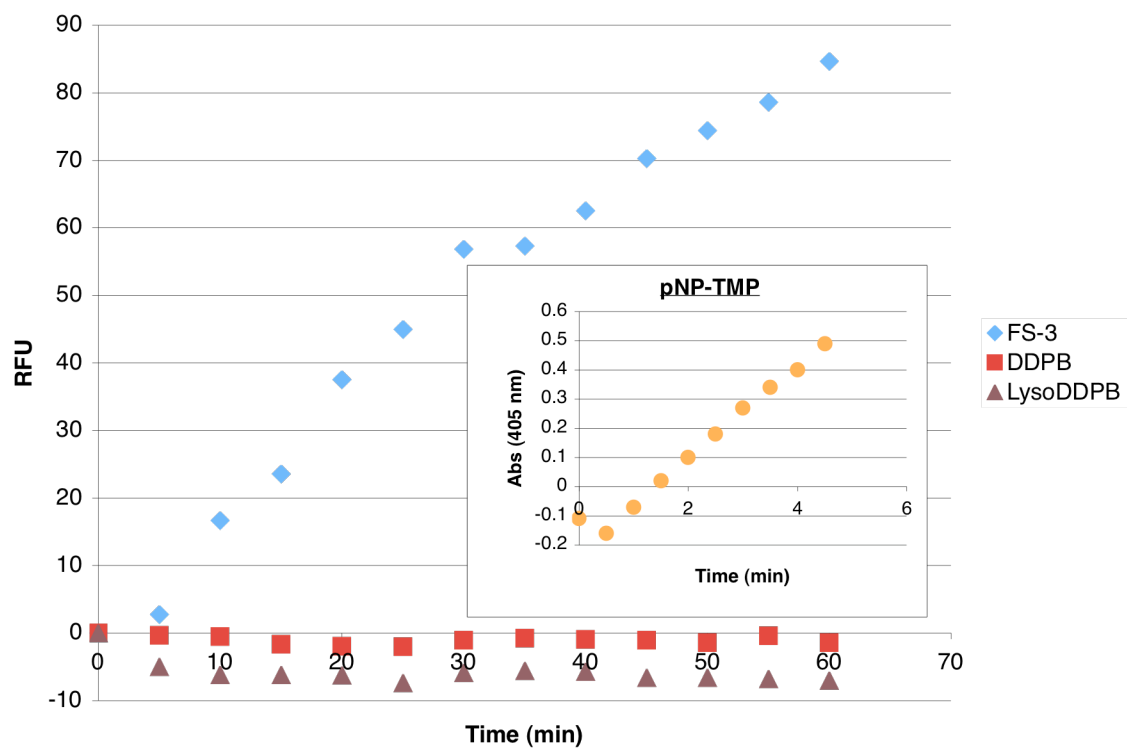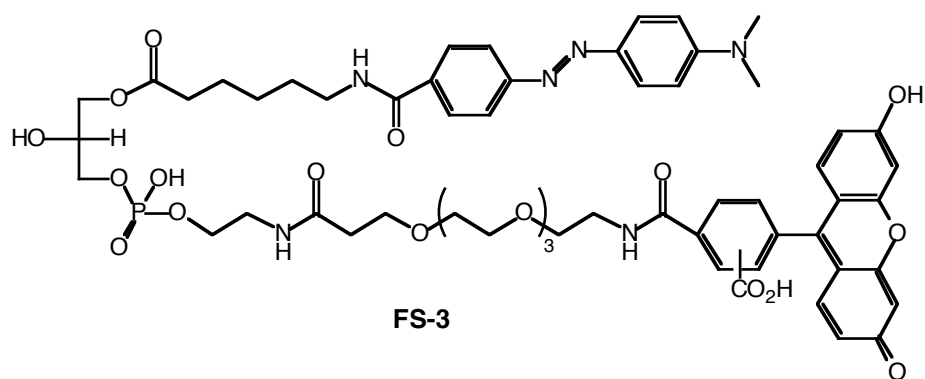

FS-3

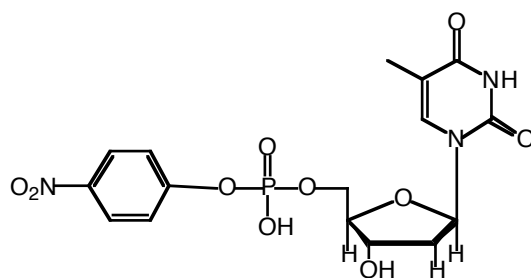

pNP-TMP

Figure 4

## EXPERIMENTAL METHODS

*Synthesis of 6-(p-methyl red) aminohexanoic acid.* The sodium salt of *p*-methyl red (Acros) was converted to its acid form by treatment with 2 M HCl, followed by lyophilization. The acid form (6.8 g, 25 mmol) was then combined with NHS (*N*-hydroxysuccinimide, 4.4 g, 38 mmol) and EDCI (*N*-(3-Dimethylaminopropyl)-*N'*-ethylcarbodiimide hydrochloride, 7.3 g, 38 mmol) in DMF (60 mL). After stirring overnight, the reaction was concentrated under vacuum and washed (H<sub>2</sub>O) to give the NHS-ester of *p*-methyl red (**3**). Compound **3** (226 mg, 0.62 mmol) was further reacted with 6-aminocaproic acid (123 mg, 0.94 mmol) in a 2:1 solution of DMF:H<sub>2</sub>O containing 7% DMAP. After 24 h, the reaction was acidified with 3 M HCl, then extracted with 10% MeOH in CH<sub>2</sub>Cl<sub>2</sub>. Solvents were removed *in vacuo* and the product was precipitated from EtOH/H<sub>2</sub>O as a deep red solid (200 mg, 77% yield, two steps).  $\delta_{\text{H}}$ (400 MHz, CDCl<sub>3</sub>): 7.87–7.77 (m, 6H), 6.74–6.69 (d, *J* = 9.2 Hz, 2H), 3.41–3.33 (t, *J* = 7.0 Hz, 2H), 3.06 (s, 6H), 2.32–2.25 (t, *J* = 7.4 Hz, 2H), 1.67–1.56 (m, 4H), 1.44–1.34 (m, 2H). HRMS (ESI): *m/z* 383.2088; calcd: 383.2083 (M+H)<sup>+</sup>.

*Synthesis of 1-O-(6-(p-methyl red)-aminohexanoyl)-sn-glyceryl phosphatidylcholine (2).* CDI (Carbonyldiimidazole, 35 mg, 0.22 mmol) was added to 6-(*p*-methyl red) aminohexanoic acid (53 mg, 0.14 mmol) stirring in 2 mL CHCl<sub>3</sub>. After one hour, another 18 mg (0.11 mmol) CDI was added until the acid was completely consumed. After another hour stirring, the solvents were removed from the reaction mixture by rotary evaporator. The residue was dissolved in DMF (2 mL) and cooled in an ice bath. 36 mg (0.14 mmol) *sn*-glycero-3-phosphocholine (**1**, Bachem) and 42  $\mu$ L (0.28 mmol) DBU were added and the reaction was allowed to slowly warm to 4 °C.

After 48 hours at 4 °C, the DMF was removed under vacuum and the residue passed through a SiO<sub>2</sub> (Flash Chromatography ASTM 230–400 Silica Gel) column using 65:25:4 CH<sub>2</sub>Cl<sub>2</sub>:MeOH:H<sub>2</sub>O (23 mg, 26% yield).  $\delta_{\text{H}}$ (d-DMSO): 8.03 (d, J= 8.4 Hz, 2H, dabcy), 7.83 (d, J= 8.8 Hz, 2H, dabcy), 7.82 (d, J= 8.4 Hz, 2H, dabcy), 6.84 (d, J= 9.6 Hz, 2H, dabcy), 4.14-4.05 (br m, 2H), 4.05-3.94 (m, 2H), 3.80-3.75 (br m, 1H), 3.74-3.68 (br m, 2H), 3.60-3.54 (br m, 2H), 3.32-3.24 (br m, 2H), 3.15 (s, 9H), 3.07 (s, 6H, dabcy), 2.33 (t, J= 7.2 Hz, 2H), 1.63-1.51 (br m, 4H), 1.40-1.29 (br m, 2H).  $\delta_{\text{C}}$ (101 MHz, d-DMSO): 173.6, 166.2, 154.5, 153.5, 143.3, 135.6, 129.0, 125.8, 122.1, 112.2, 68.9, 66.6, 66.0, 65.8, 59.2, 59.1, 53.8, 34.1, 29.5, 26.6, 24.9.  $\delta_{\text{p}}$ (162 MHz, d-DMSO): 1.0. HRMS (MALDI): *m/z* 622.3011; calcd: 622.3006 (M<sup>+</sup>).

*Synthesis of 1-O-(6-(p-methyl red)-amino-hexanoyl)-2-O-(12-Boc-amino-dodecanoyl)-sn-glyceryl phosphatidylcholine.* 12-Boc-amino-dodecanoic acid (139 mg, 0.44 mg), TPSNT<sup>36</sup> (161 mg, 0.42 mmol), and methylimidazole (65  $\mu$ L, 0.82 mmol) were combined in 4 mL distilled CH<sub>2</sub>Cl<sub>2</sub> under Ar. After 40 min., the resulting solution was transferred to 85 mg (0.14 mmol) **2** stirring in 5 mL CH<sub>2</sub>Cl<sub>2</sub>. After 24 hours at room T, the solvent was removed and the product purified from SiO<sub>2</sub> with 65:25:4 CH<sub>2</sub>Cl<sub>2</sub>:MeOH:H<sub>2</sub>O (98 mg, 78% yield).  $\delta_{\text{H}}$ (d-DMSO): 8.04 (d, J= 8.4 Hz, 2H, dabcy), 7.84-7.78 (m, 4H, dabcy), 6.85 (d, J= 9.2 Hz, 2H, dabcy), 5.12-5.05 (br m, 1H), 4.30 (dd, J= 12, 3.2 Hz, 1H), 4.12 (dd, J= 12, 6.4 Hz, 1H), 4.10-4.03 (br m, 2H), 3.82-3.75 (br m, 2H), 3.58-3.53 (br m, 2H), 3.31-3.23 (br m, 2H), 3.15 (s, 9H), 3.08 (s, 6H, dabcy), 2.91-2.83 (br m, 2H), 2.31 (t, J= 6.8 Hz, 2H), 2.27 (t, J= 7.6 Hz, 2H), 1.62-1.44 (br m, 6H), 1.39-1.28 (br m, 4H), 1.36 (s, 9H), 1.26-1.15 (br m, 14 H).  $\delta_{\text{C}}$ (d-DMSO): 173.3, 173.1, 166.1, 156.2, 154.5, 153.5, 143.3, 135.6, 129.0, 125.7, 122.1, 112.2, 77.9, 71.2,



66.1, 63.2, 63.0, 59.1, 59.0, 55.6, 53.8, 34.2, 34.0, 30.2, 29.7, 29.6, 29.6, 29.4, 29.1, 28.9, 27.0, 26.6, 25.1.  $\delta_p$ (d-DMSO): -0.44. HRMS (MALDI):  $m/z$  919.5327; calcd: 919.5310 ( $M^+$ ).

*Synthesis of 1-O-(6-(p-methyl red)-amino-hexanoyl)-2-O-(12-(p-methyl red)-amino-dodecanoyl)-sn-glyceryl phosphatidylcholine (4).* A solution of 2-O-boc-protected PC intermediate (42 mg, 0.05 mmol) in 5 mL  $CH_2Cl_2$  was treated with 0.5 mL TFA. After 1 hour, solvents were completely removed by vacuum and the residue was dissolved in 5 mL DMF. TEAB buffer (4 mL, 1 M, pH 8.4) and **3** (26 mg, 0.07 mmol) were added and the resulting solution was stirred overnight. Product **4** was collected from  $SiO_2$  using a step gradient: a) 20% MeOH in  $CH_2Cl_2$ ; b) 70:20:2  $CH_2Cl_2$ :MeOH:H<sub>2</sub>O; c) 65:25:4  $CH_2Cl_2$ :MeOH:H<sub>2</sub>O (37 mg, 76% yield).

$\delta_H$ ( $CDCl_3$ : $CD_3OD$ , 1:1): 7.89 (d, J= 8.8 Hz, 2H, dabcy1), 7.87 (d, J= 8.4 Hz, 2H, dabcy1), 7.85-7.77 (m, 8H, dabcy1), 6.73 (d, J= 9.6 Hz, 4H, dabcy1), 5.23-5.16 (br m, 1H), 4.40 (dd, J= 12, 3.4 Hz, 1H), 4.25-4.18 (br m, 2H), 4.13 (dd, J= 12, 6.6 Hz, 1H), 3.97 (t, J= 6.5 Hz, 2H), 3.59-3.54 (br m, 2H), 3.41-3.32 (br m, 4H), 3.17 (s, 9H), 3.07 (s, 6H, dabcy1), 3.06 (s, 6H, dabcy1), 2.33 (t, J= 7.6 Hz, 2H), 2.30 (t, J= 7.2 Hz, 2H), 1.70-1.52 (br m, 6H), 1.45-1.36 (br m, 2H), 1.38-1.20 (br m, 16 H).  $\delta_C$ ( $CDCl_3$ : $CD_3OD$ , 1:1): 173.9, 173.7, 168.4, 168.4, 155.1, 155.1, 153.2, 143.6, 134.9, 134.8, 128.2, 128.2, 125.5, 122.1, 111.6, 70.5, 66.5, 63.6, 62.7, 59.2, 59.2, 54.0, 40.3, 40.0, 34.2, 33.9, 30.5, 29.6, 29.5, 29.5, 29.4, 29.1, 27.2, 26.5, 25.0, 24.6.  $\delta_p$ ( $CDCl_3$ : $CD_3OD$ , 1:1): 0.44. HRMS (MALDI):  $m/z$  1070.5856; calcd: 1070.5844 ( $M^+$ ).

*(3-dimethylamino-propyl)-carbamic acid-1,1-dimethylethyl ester (5).* 3-dimethylamino-propylamine (1 mL, 8 mmol) was dissolved in 1 M NaOH (27 mL). Di-

*tert*-butyl dicarbonate (4 mL, 19 mmol) was added to the stirring solution. After 1.5 hours, the reaction was extracted twice with CH<sub>2</sub>Cl<sub>2</sub>. The organic layer was washed with brine and then stripped of solvent under vacuum. The product was of sufficient purity for use directly in the next step (598 mg, 37% yield).  $\delta_{\text{H}}(\text{CD}_3\text{OD})$ : 3.05 (t, J= 7.0 Hz, 2H), 2.36-2.31 (m, 2H), 2.23 (s, 6H), 1.65 (tt, J= 7.6, 7.0, 2H), 1.43 (s, 9H).  $\delta_{\text{C}}(\text{CD}_3\text{OD})$ : 157.3, 78.6, 56.9, 44.3, 38.4, 27.7, 27.5. HRMS (MALDI):  $m/z$  203.17555; calcd: 203.1760 (M<sup>+</sup>).

*(3-(1,1-dimethylethoxycarbonyl)amino-propyl)-(2-hydroxyethyl)-dimethylammonium bromide (6)*. Boc-protected 3-dimethylamino-propylamine (178 mg, 0.88 mmol) was dissolved in 3 mL DMF. DIPEA (153  $\mu\text{L}$ , 0.88 mmol), then 2-bromoethanol (63  $\mu\text{L}$ , 0.88 mmol) were added and the reaction was stirred under Ar. The reaction was stirred overnight at 50 °C, at which time the volatile components were removed under vacuum. The residue was macerated in acetone and filtered through Celite to give solid product, **5**, which was nearly pure by NMR and used directly in the ensuing step (214 mg, 98% yield).  $\delta_{\text{H}}(\text{CD}_3\text{OD})$ : 4.03-3.97 (br m, 2H), 3.58-3.53 (br m, 2H), 3.53-3.45 (br m, 2H), 3.22 (s, 6H), 3.15 (t, J= 6.6, 2H), 2.05-1.96 (br m, 2H), 1.43 (s, 9H).  $\delta_{\text{C}}(\text{CD}_3\text{OD})$ : 157.2, 79.1, 65.5, 63.4, 51.5, 51.4, 51.4, 37.3, 27.7, 23.3. HRMS (MALDI):  $m/z$  247.2005; calcd: 247.2022 (M<sup>+</sup>).

*Synthesis of 1-O-(6-(p-methyl red)-amino-hexanoyl)-2-O-(12-(p-methyl red)-amino-dodecanoyl)-sn-glyceryl-N-(3-Boc-amino-propyl)-N,N-dimethylphosphatidylethanolamine (7)*. Compound **4** (17 mg, 0.02 mmol) was dissolved in CHCl<sub>3</sub> (3 mL) with a > 20-fold molar excess of **6** (151 mg, 0.46 mmol). *Streptomyces Sp.* PLD(P) (Genzyme) (1.3 mg, ca. 400 U.) was added in 0.5 mL buffer (0.2 M NaOAc, 0.08

M CaCl<sub>2</sub>, pH 5.4), and the biphasic solution was allowed to stir at 45 °C. After 1 hour, another 0.7 mg PLD (ca. 200 U.) was added in 0.2 mL buffer, and after an additional 2 hours, another 0.5 mg PLD (ca. 150 U.) was added in 0.3 mL buffer, resulting in almost complete consumption of **4**. The reaction mixture was diluted with AcCN and evaporated to dryness. The residue was purified from SiO<sub>2</sub> using a step gradient: a) 10% MeOH:CH<sub>2</sub>Cl<sub>2</sub>; b) 20% MeOH:CH<sub>2</sub>Cl<sub>2</sub>; c) 65:25:4 CH<sub>2</sub>Cl<sub>2</sub>:MeOH:H<sub>2</sub>O (9.5 mg, 50% yield).  $\delta_{\text{H}}$ (d-DMSO): 8.01 (d, J= 8.6 Hz, 2H, dabcy), 7.99 (d, J= 8.6 Hz, 2H, dabcy), 7.84-7.76 (m, 8H, dabcy), 6.84 (d, J= 9.2 Hz, 2H, dabcy), 6.83 (d, J= 9.2 Hz, 2H, dabcy), 5.13-5.05 (br m, 1H), 4.30 (dd, J= 12, 3.2 Hz, 1H), 4.12 (dd, J= 12, 6.4 Hz, 1H), 4.10-4.03 (br m, 2H), 3.84-3.77 (br m, 2H), 3.57-3.50 (br m, 2H), 3.40-3.33 (br m, 2H), 3.31-3.21 (m, 4H), 3.09 (s, 6H), 3.08 (s, 6H, dabcy), 3.07 (s, 6H, dabcy), 3.02-2.94 (br m, 2H), 2.34-2.23 (m, 4H), 1.89-1.78 (br m, 2H), 1.61-1.45 (br m, 6H), 1.45-1.18 (br m, 18H), 1.38 (s, 9H).  $\delta_{\text{C}}$ (d-DMSO, selected peaks): 166.0, 129.0, 122.1, 112.3, 95.4, 31.4, 29.5, 29.2, 28.9, 1.4, 0.8.  $\delta_{\text{p}}$ (d-DMSO): -1.0. HRMS (ESI):  $m/z$  607.34284; calcd: 607.34288 (M+H)<sup>++</sup>.

*Synthesis of 1-O-(6-(p-methyl red)-amino-hexanoyl)-2-O-(12-(p-methyl red)-amino-dodecanoyl)-sn-glyceryl-N-(3-(5-BODIPY-pentanoyl)-amino-propyl)-N,N-dimethyl-phosphatidylethanolamine (DDPB).* Compound **7** (4 mg, 3.3  $\mu$ mol) was dissolved in CHCl<sub>3</sub> (2 mL), to which was added 0.2 mL TFA. After 15-20 min. the solvents were removed completely under vacuum. The resulting red film was dissolved in TEAB buffer (3 mL, 1 M, pH 8.3) and treated with 1.8 mg (4.3  $\mu$ mol) C<sub>5</sub>-BODIPY, SE in 0.7 mL DMF. After 2 hours, more C<sub>5</sub>-BODIPY, SE (1.1 mg, 2.6  $\mu$ mol) in 0.8 mL DMF was added. After 1 hour, the solvents were removed by vacuum and the residue

purified on SiO<sub>2</sub> with a step gradient: a) 20% MeOH:CH<sub>2</sub>Cl<sub>2</sub>; b) 25% MeOH:CH<sub>2</sub>Cl<sub>2</sub>; c) 65:25:4 CH<sub>2</sub>Cl<sub>2</sub>:MeOH:H<sub>2</sub>O (3.0 mg, 64% yield).  $\delta_{\text{H}}$ (d-DMSO): 8.70 (br s, 1H, amide-NH), 8.57 (br s, 1H, amide-NH), 8.41 (br s, 1H, amide-NH), 8.04-7.95 (br m, 4H, dabcy), 7.85-7.75 (br m, 8H, dabcy), 7.6-7.64 (br m, 1H, BODIPY), 7.13-7.07 (br m, 1H, BODIPY), 6.87-6.80 (br m, 4H, dabcy), 6.44-6.38 (br m, 1H, BODIPY), 6.28-6.25 (br m, 1H, BODIPY), 5.12-5.04 (br m, 1H), 4.32-4.23 (br m, 1H), 4.15-4.07 (br m, 1H), 4.07-3.98 (br m, 2H), 3.83-3.74 (br m, 2H), 3.53-3.47 (br m, 2H), 3.30-3.21 (br m, 4H), 3.18-3.10 (br m, 2H), 3.05 (br m, 18H), 2.87-2.78, 2.45 (br s, 3H, BODIPY), 2.34-2.23 (br m, 4H), 2.24 (br s, 3H, BODIPY), 2.20-2.12 (br m, 2H), 2.12-2.06 (br m, 2H), 1.93-1.82 (br m, 2H), 1.70-1.43 (br m, 12H), 1.40-1.15 (br m, 18H).  $\delta_{\text{C}}$ (d-DMSO, selected peaks): 134.8, 128.2, 125.5, 122.1, 111.6, 110.0, 40.0.  $\delta_{\text{p}}$ (d-DMSO): 0.11. HRMS (ESI):  $m/z$  708.38732; calcd: 708.38732 (M+H)<sup>++</sup>.

*Synthesis of 1-O-(6-(p-methyl red)-amino-hexanoyl)-sn-glyceryl-N-(3-(5-BODIPY-pentanoyl)-amino-propyl)-N,N-dimethyl-phosphatidylethanolamine (lysoDDPB).* Tris buffer (0.1 M) at pH 8.9 containing CaCl<sub>2</sub> (0.1 M) and 0.05% NaN<sub>3</sub> was used to prepare a 1 U/ $\mu$ L stock solution of *Naja mossambica moss.* PLA<sub>2</sub>. **DDPB** (2 mg, 1.4  $\mu$ mol) dissolved in MeOH (0.4 mL) was treated with 400  $\mu$ L of the PLA<sub>2</sub> stock solution and allowed to stir at RT for 1.5 h. Solvents were then removed *in vacuo* and the residue applied to a column of SiO<sub>2</sub> and eluted with 65:25:4 CH<sub>2</sub>Cl<sub>2</sub>:MeOH:H<sub>2</sub>O (65:25:4). **LysoDDPB** (1.3 mg, 96% yield) was collected as a red solid.  $\delta_{\text{H}}$ (d-DMSO): 8.71-8.65 (br s, 1H, amide-NH), 8.31-8.23 (br s, 1H, amide-NH), 8.03-7.96 (d, J= 8.0 Hz, 2H, dabcy), 7.85-7.77 (br m, 4h, dabcy), 7.69-7.65 (br, 1H, BODIPY), 7.12-7.08 (br, 1H, BODIPY), 6.89-6.82 (d, J= 8.0 Hz, 2H, dabcy), 6.44-6.38 (br, 1H, BODIPY), 6.30-

6.24 (br, 1H, BODIPY), 4.11-4.01 (br, 2H), 4.01-3.86 (br m, 2H), 3.78-3.72 (br m, 1H), 3.73-3.60 (br m, 2H), 3.44-3.16 (br H<sub>2</sub>O peak), 3.16-3.10 (br m, 2H), 3.08 (s, 6H, dabcy), 3.06 (s, 6H), 2.93-2.80 (br m, 4H), 2.44 (s, 3H, BODIPY), 2.35-2.28 (br m, 2H), 2.24 (s, 3H, BODIPY), 2.19-2.11 (br m, 2H), 1.95-1.79 (br m, 4H), 1.70-1.46 (br m, 8H), 1.39-1.27 (br m, 2H).  $\delta_p$ (d-DMSO): 1.3. HRMS (MALDI):  $m/z$  967.4820; calcd: 967.4830 (M<sup>+</sup>).

*Assay procedure for DDPB and lysoDDPB in mixed micelles.* **DDPB** or **lysoDDPB** (2.5  $\mu$ g) was sonicated into a solution of Triton X-100 (reduced, 2.5 mM) to give mixed micelles 0.2 (wt)% in **DDPB** or **lysoDDPB**. For scPLD (BIOMOL), 0.1 M Tris, 0.1 M CaCl<sub>2</sub>, 0.05% NaN<sub>3</sub>, pH 8 was used. 20 mM HEPES, 10 mM CaCl<sub>2</sub>, 150 mM NaCl, pH 7.4 was the buffer for assays with *B. Cereus* PC-PLC (Sigma); the same buffer at pH 8.3 was also used to assay *B. Cereus* PI-PLC (Sigma) and the PLA<sub>2</sub> from bee and *Naja Mossambica mossambica* venoms (Sigma). A pH 5.6 buffer (0.2 M NaOAc, 80 mM CaCl<sub>2</sub>) was used with PLD from cabbage (Sigma), *Streptomyces sp.* (BIOMOL), and peanut (Sigma), and Genzyme PLD(P). Mixed micelle solutions (95  $\mu$ L) were placed in a black 96-well plate and treated with 5  $\mu$ L of the listed enzyme solutions to give a final enzyme concentration of 1 U/well. In the case of the FBS assay, a 1:1 ratio (50  $\mu$ L each) of FBS (Atlanta Biologicals, Inc.) to mixed micelle solution was used. Fluorescence was monitored (Ex 500 nm/Em 530 nm) every 15 s over 3 min to 1 h at 37 °C. Results are plotted as RFU (relative fluorescence units) versus time.

*Assay procedure with pNP-TMP and FS-3.* A 2.5 mM solution of pNP-TMP (Sigma) was prepared in 0.1 M Tris, 0.1 M CaCl<sub>2</sub>, 0.05% NaN<sub>3</sub>, pH 8.9. 20  $\mu$ L of this solution was added to 80  $\mu$ L FBS and monitored at room temperature for the time period

indicated at 405 nm. FS-3 (kindly donated by Echelon Biosciences, Inc.) was dissolved in 50 mM Tris, 50 mM CaCl<sub>2</sub>, 10 mM MgCl<sub>2</sub>, pH 8 to give a 25 μM solution. 20 μL of this solution was mixed with 80 μL FBS and monitored for the time period indicated at 37 °C and  $\lambda_{\text{Ex}}/\lambda_{\text{Em}} = 484/520$  nm.

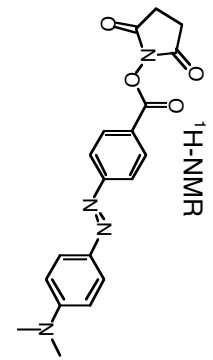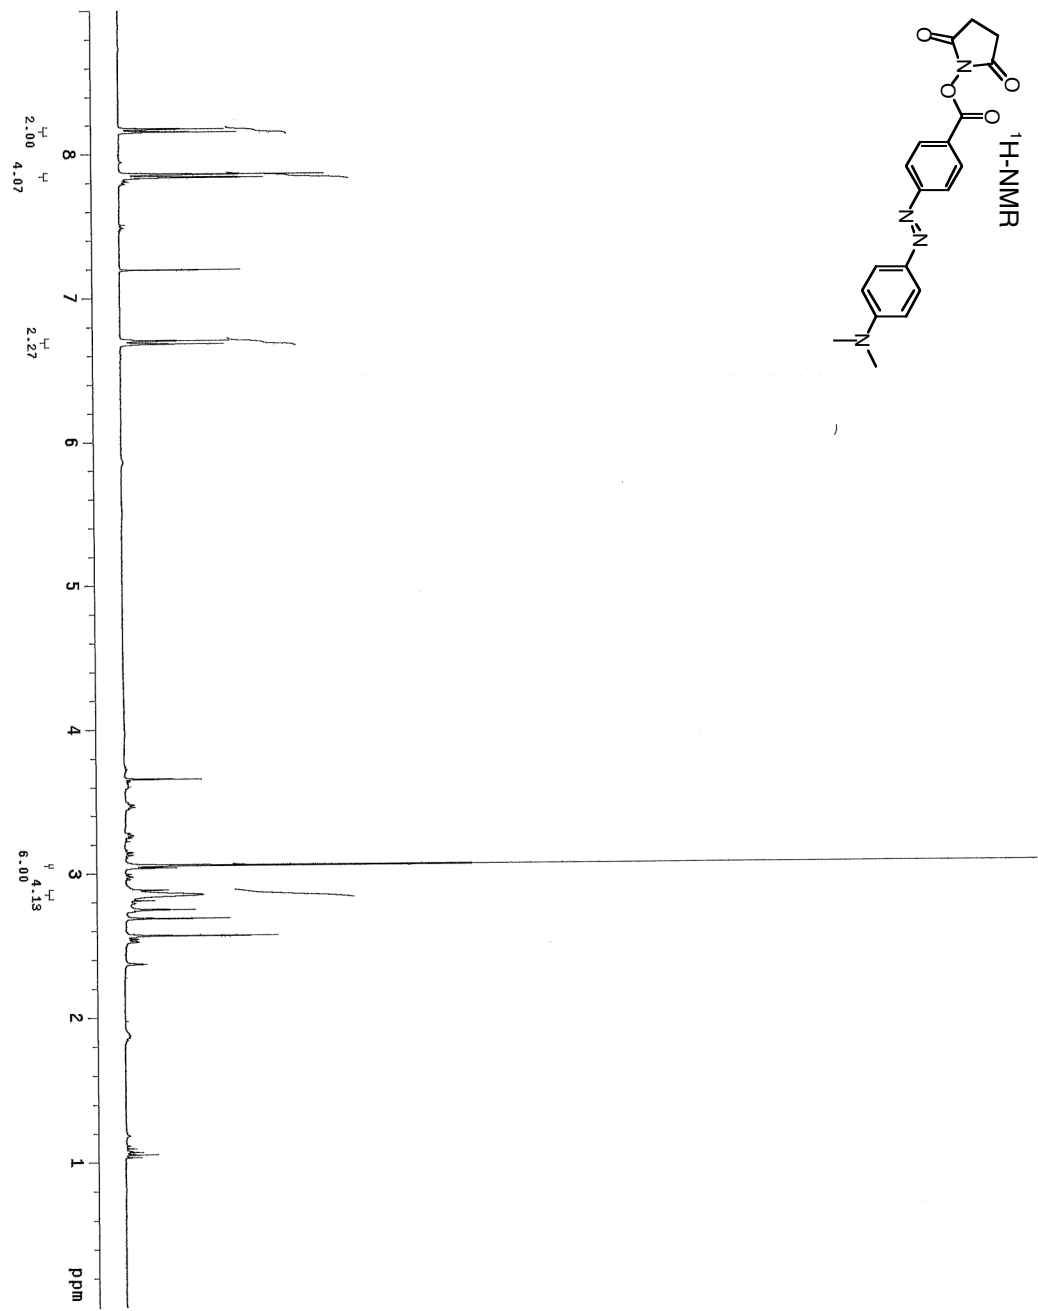

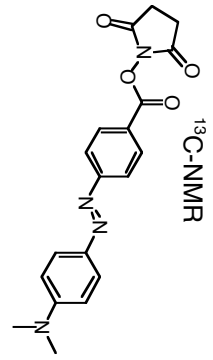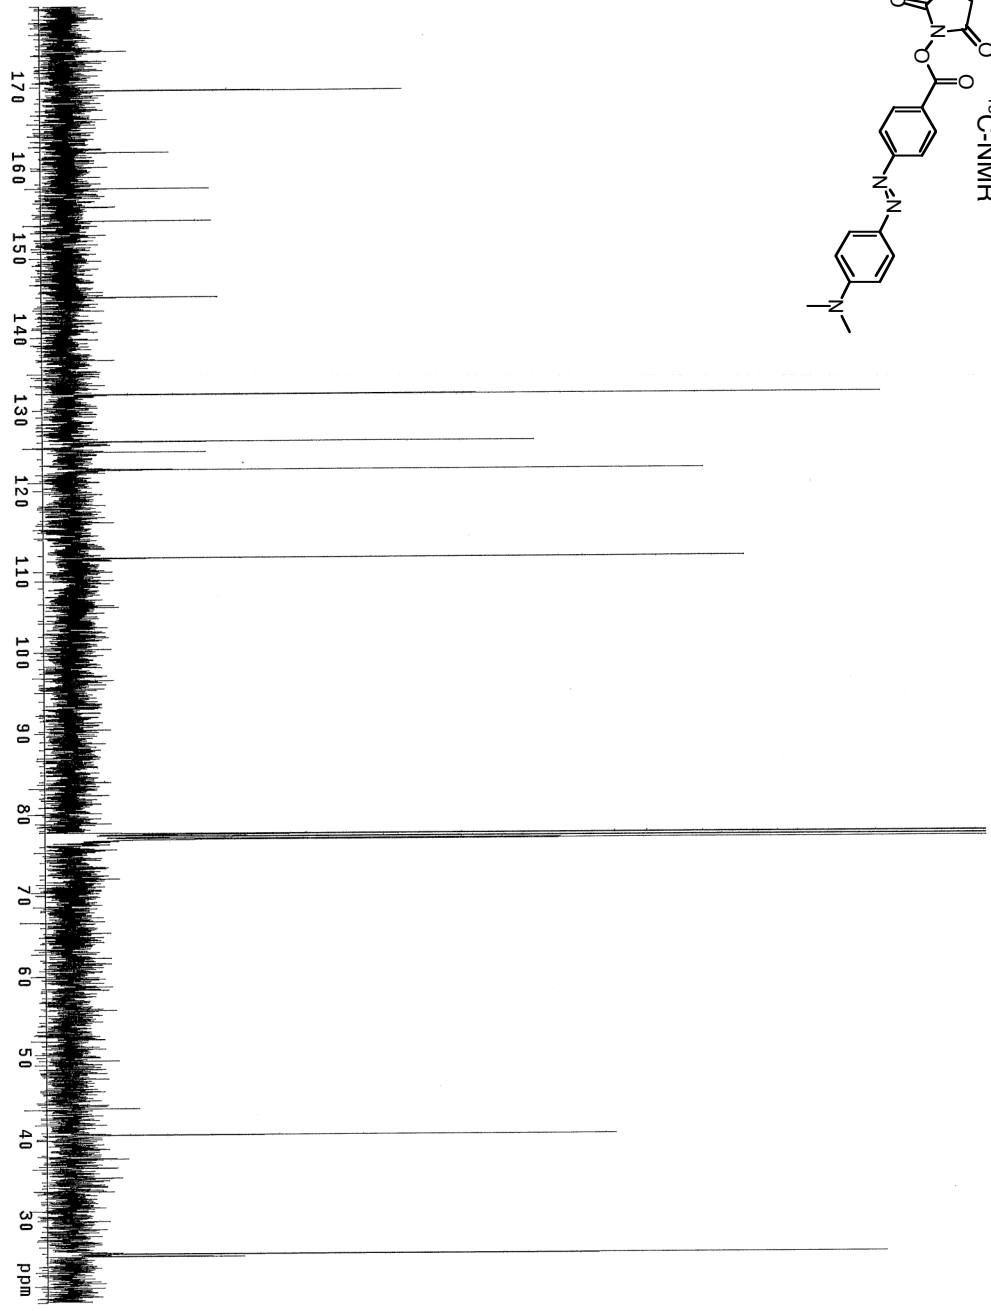



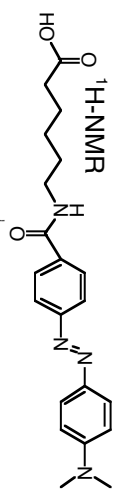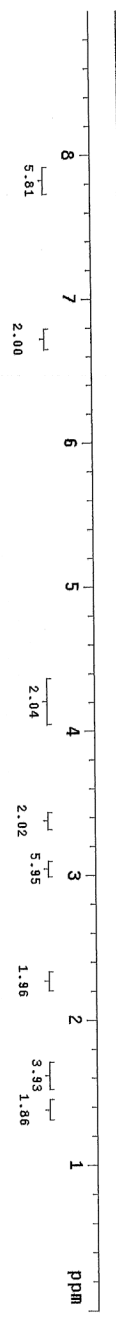

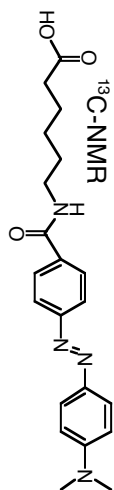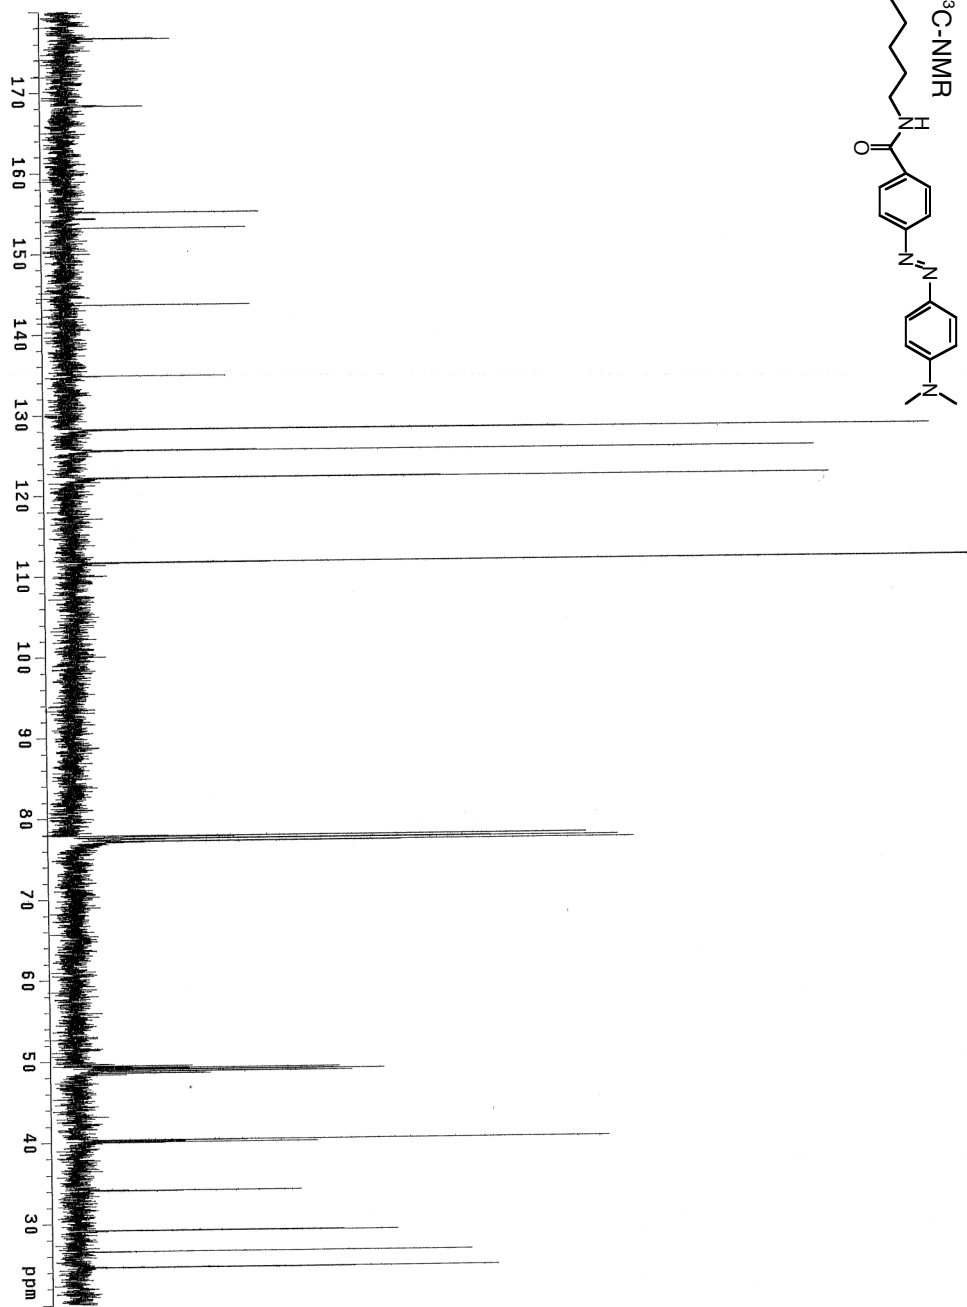

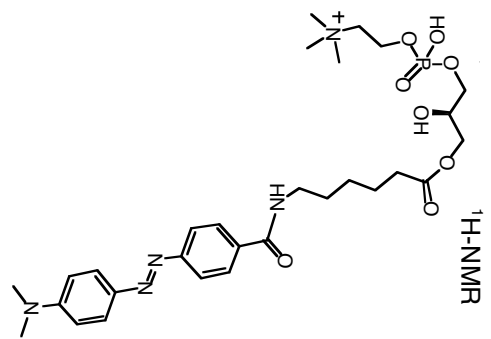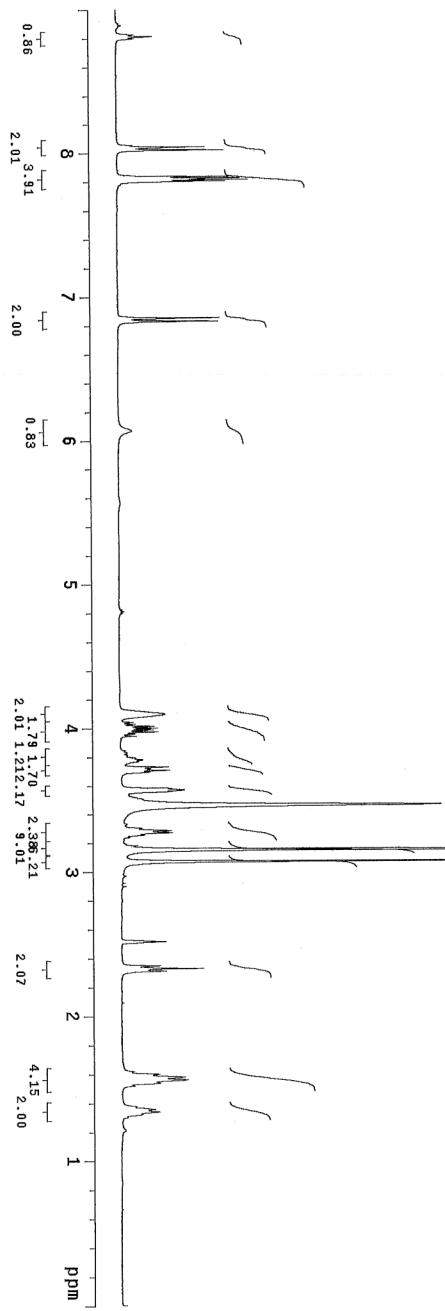

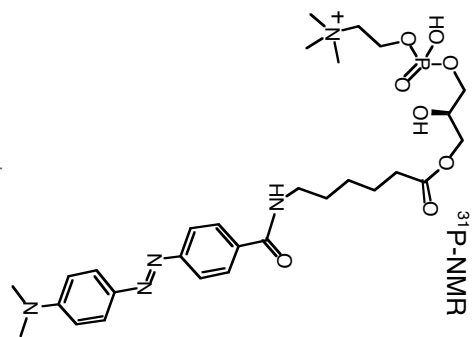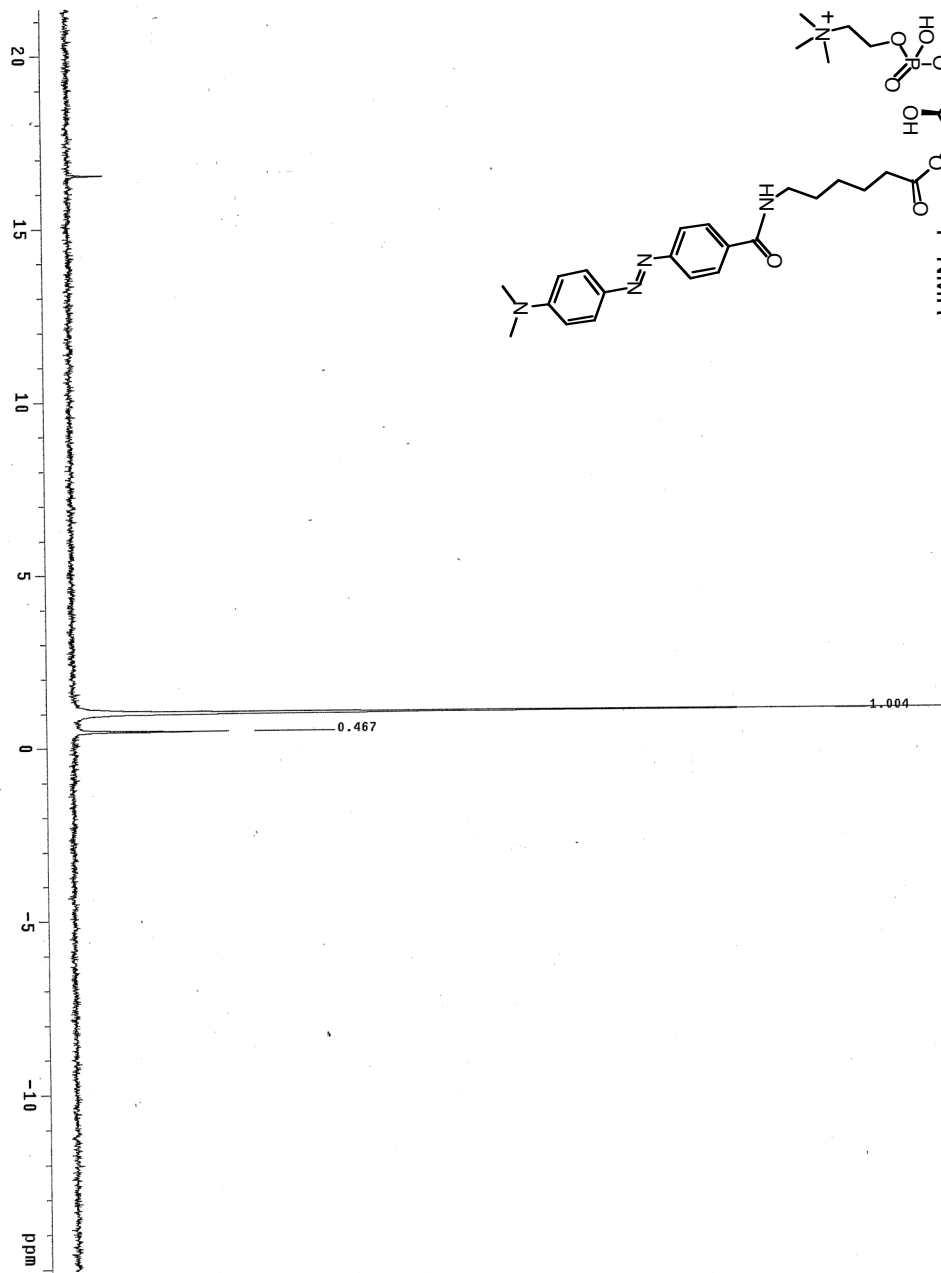

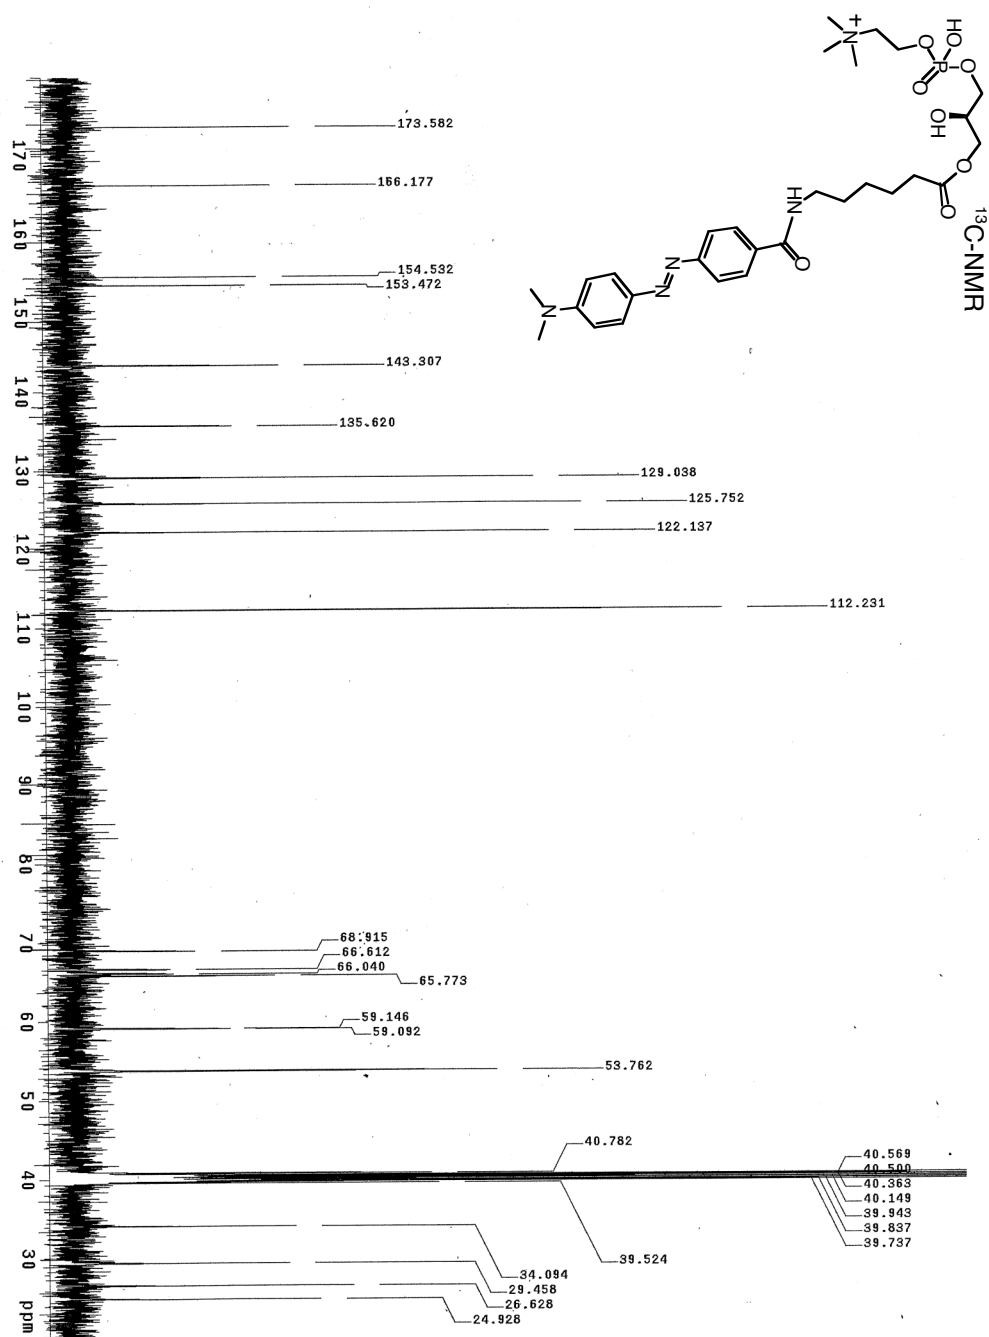

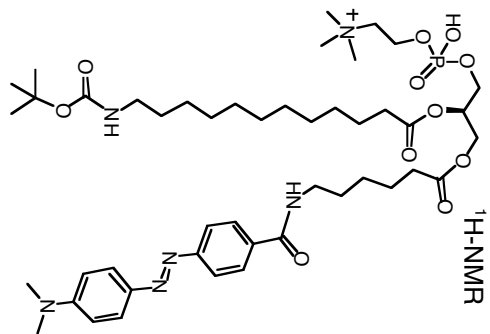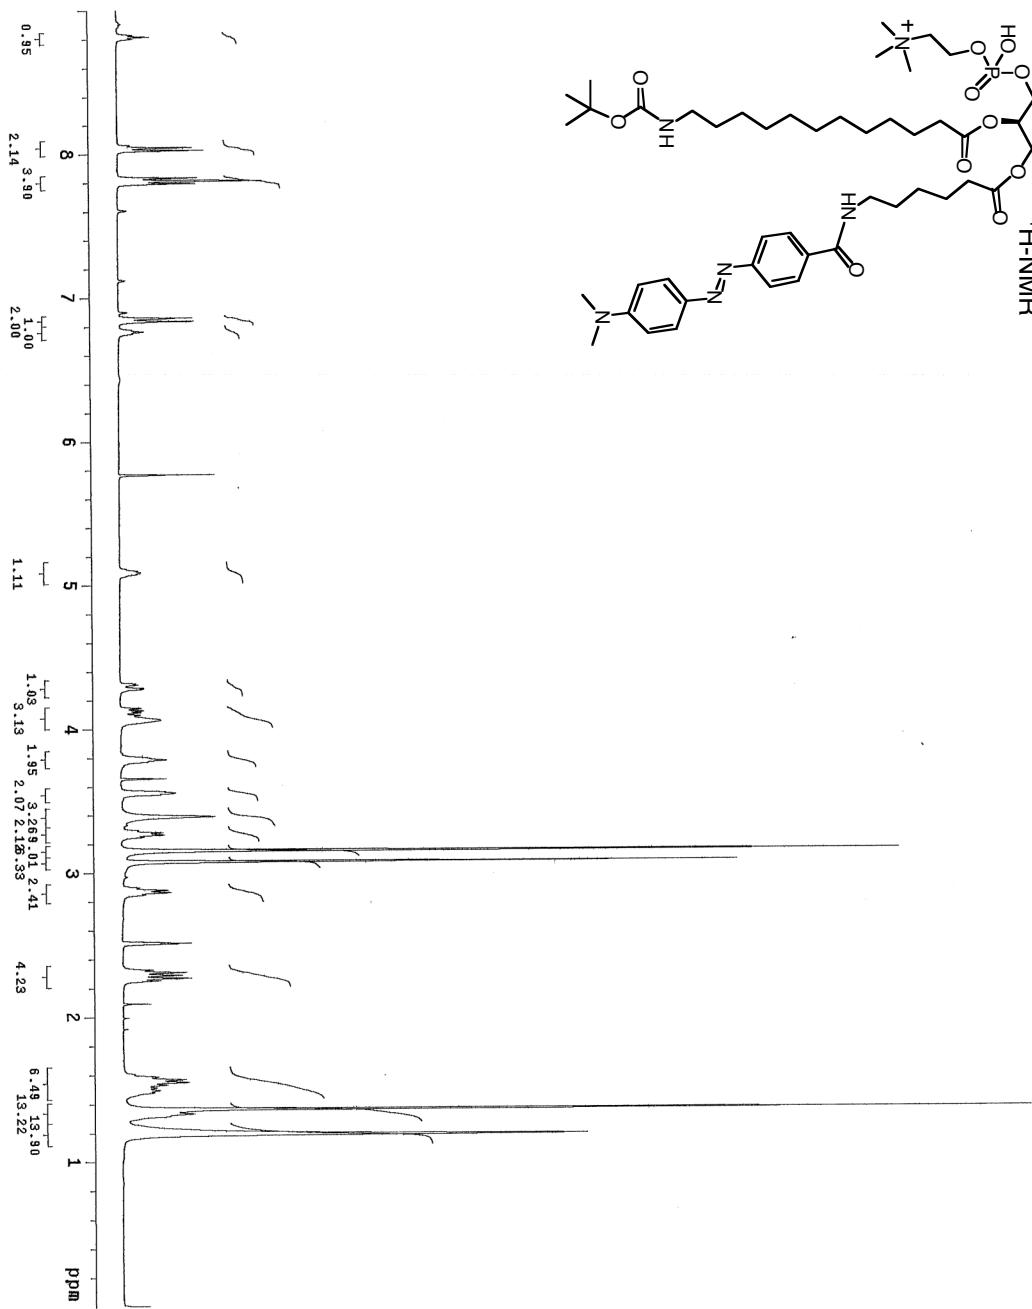

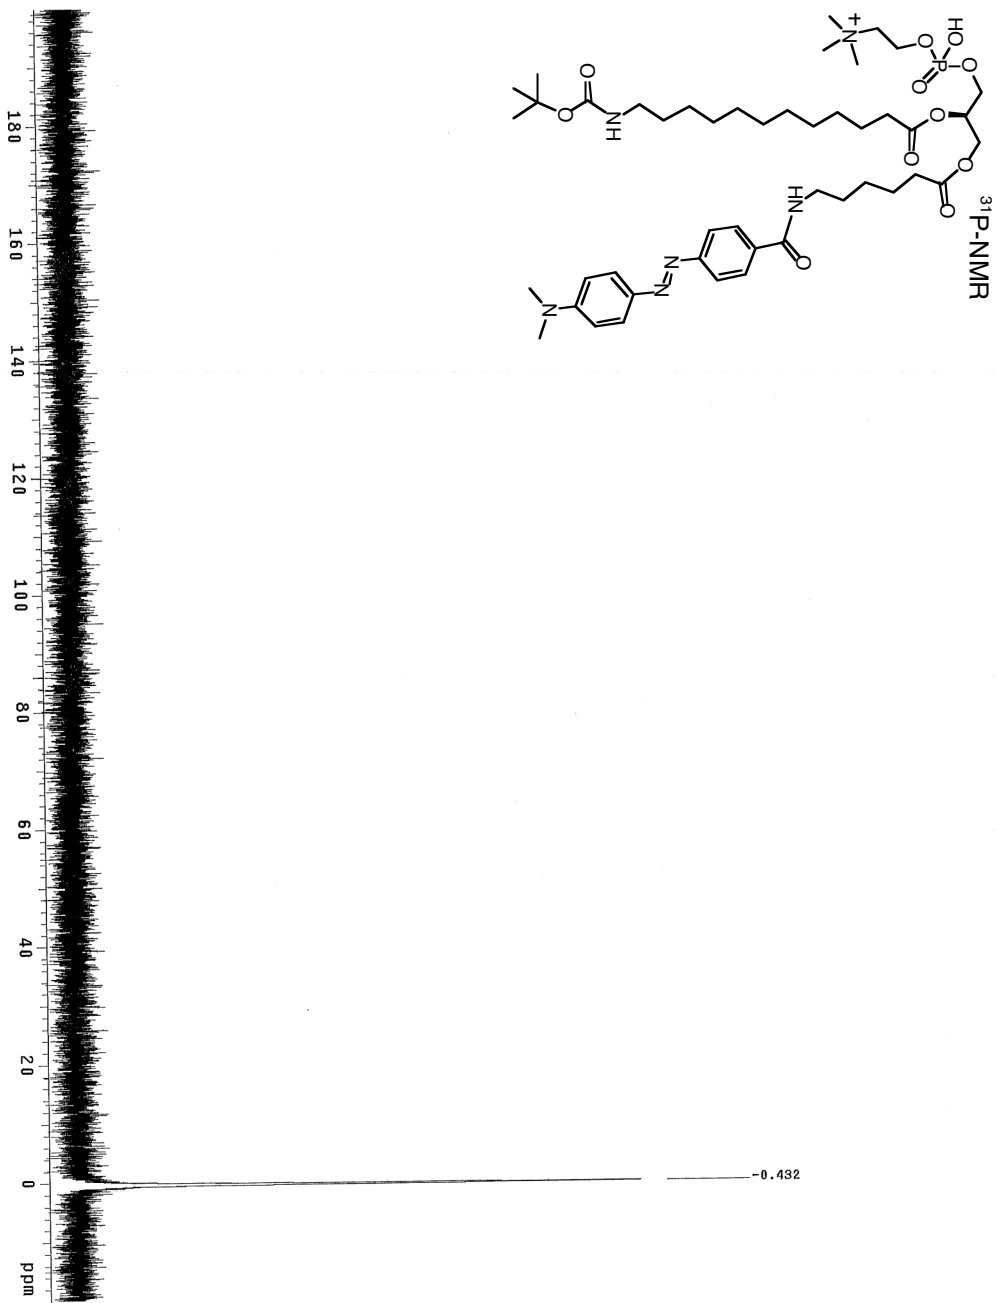





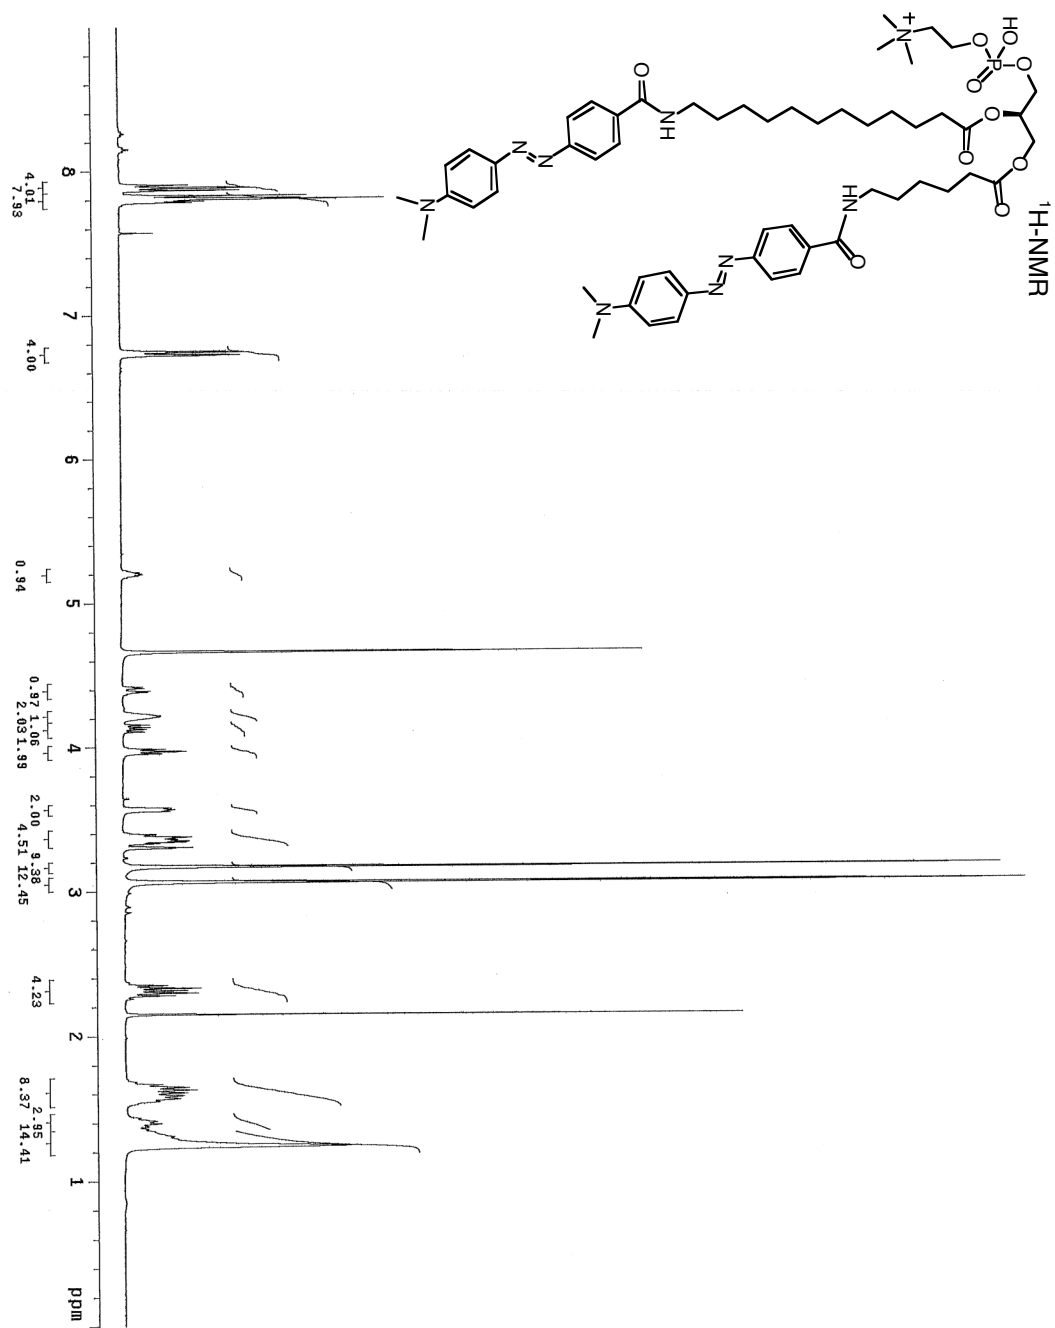

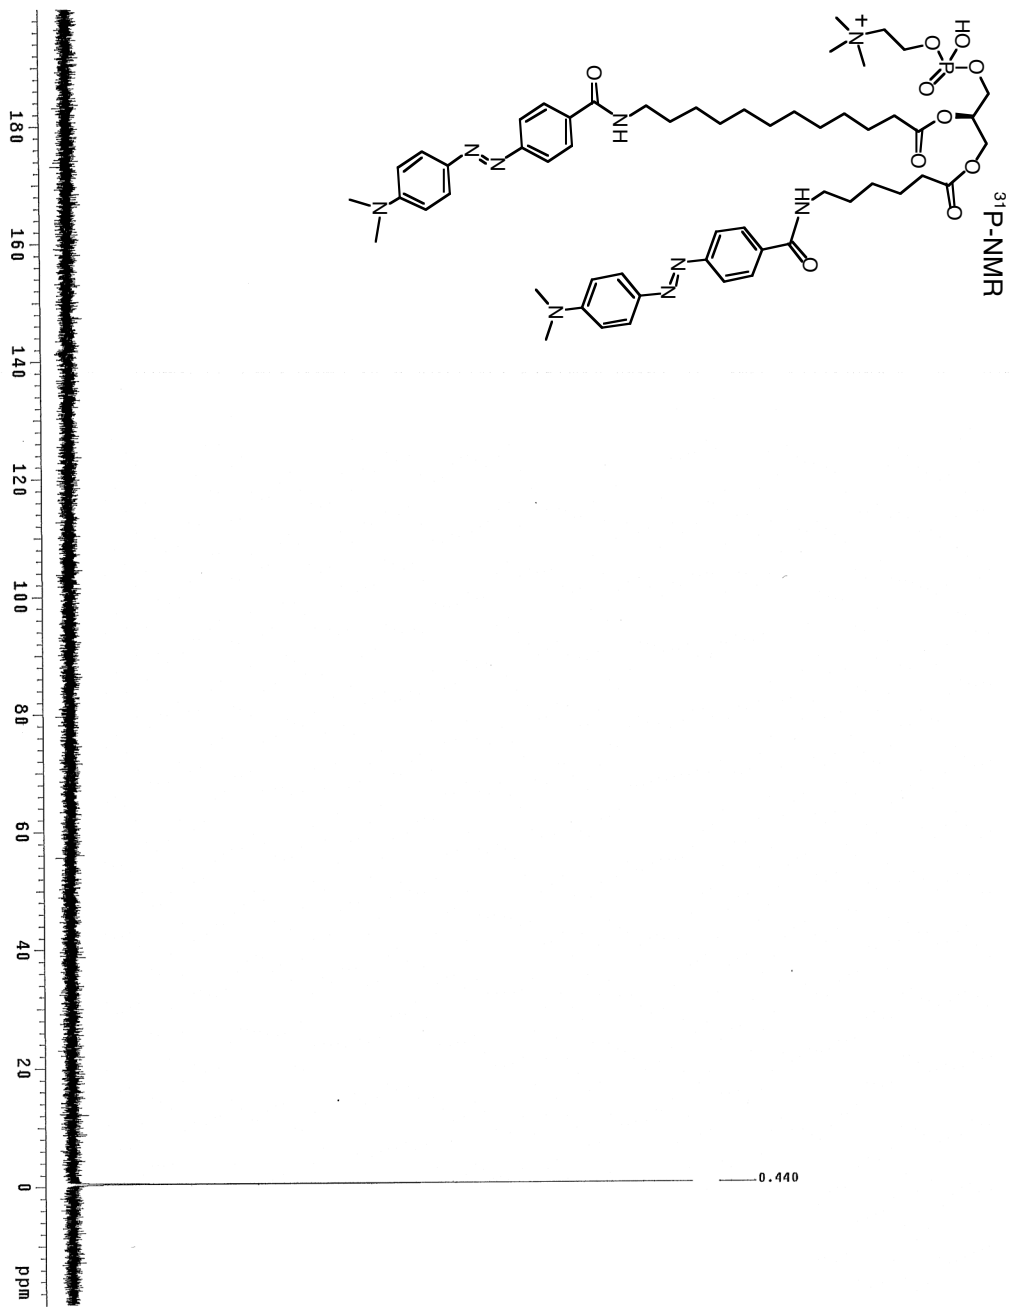

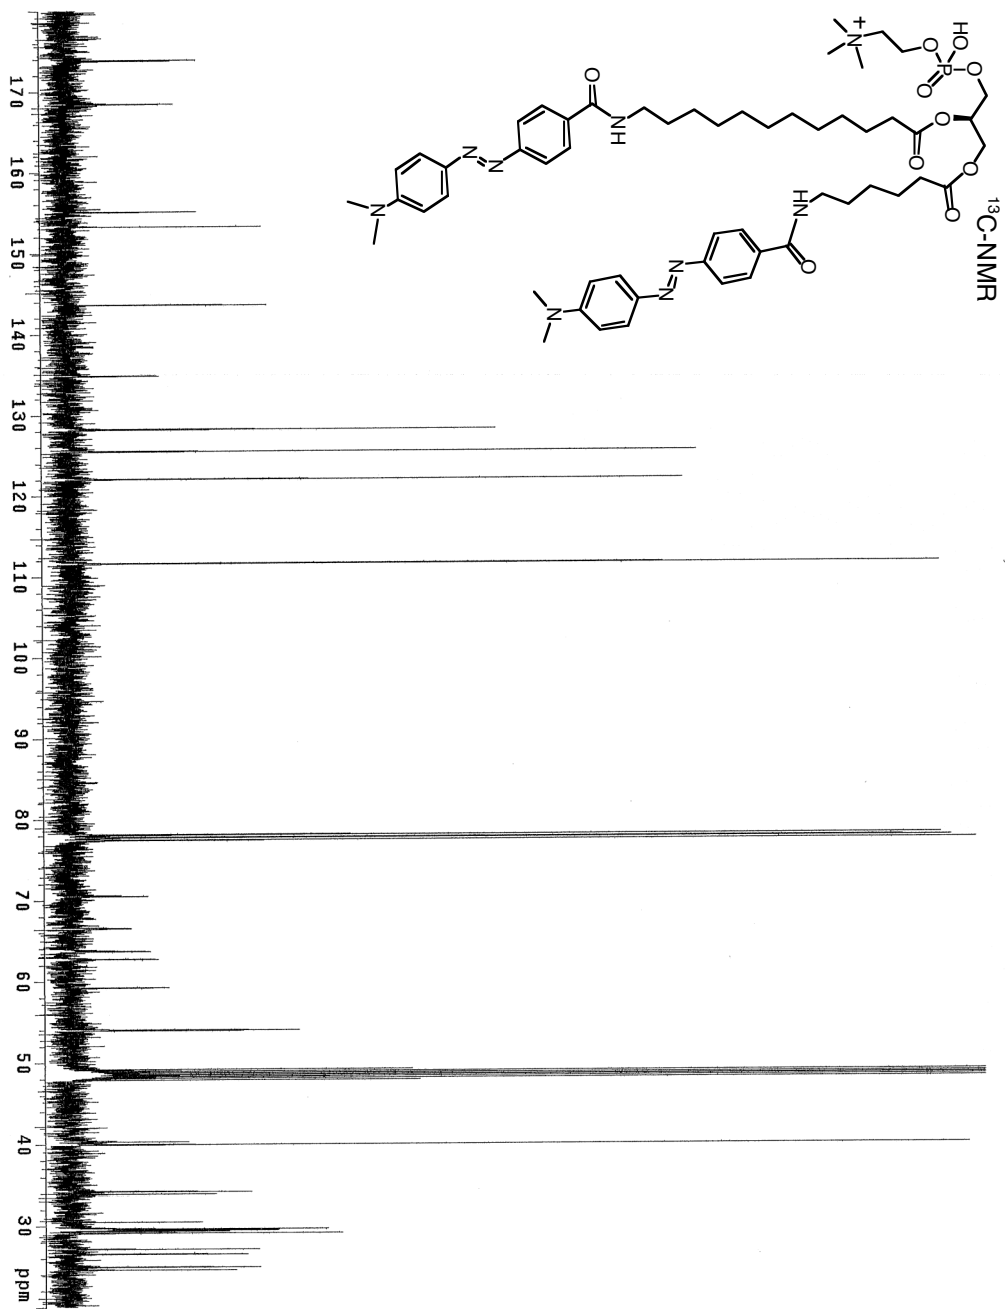

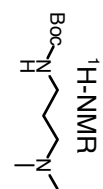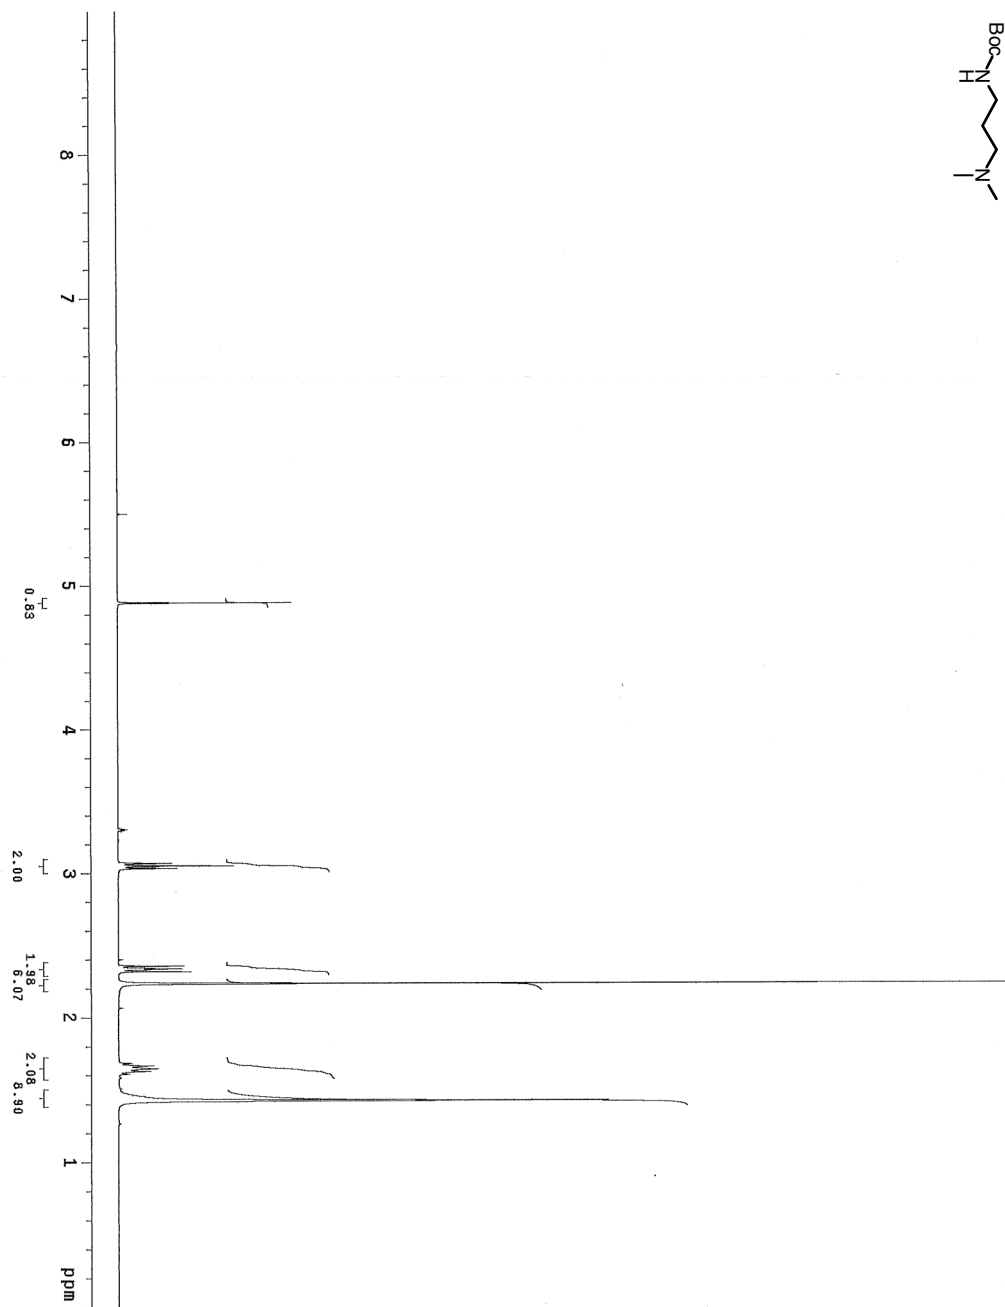

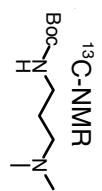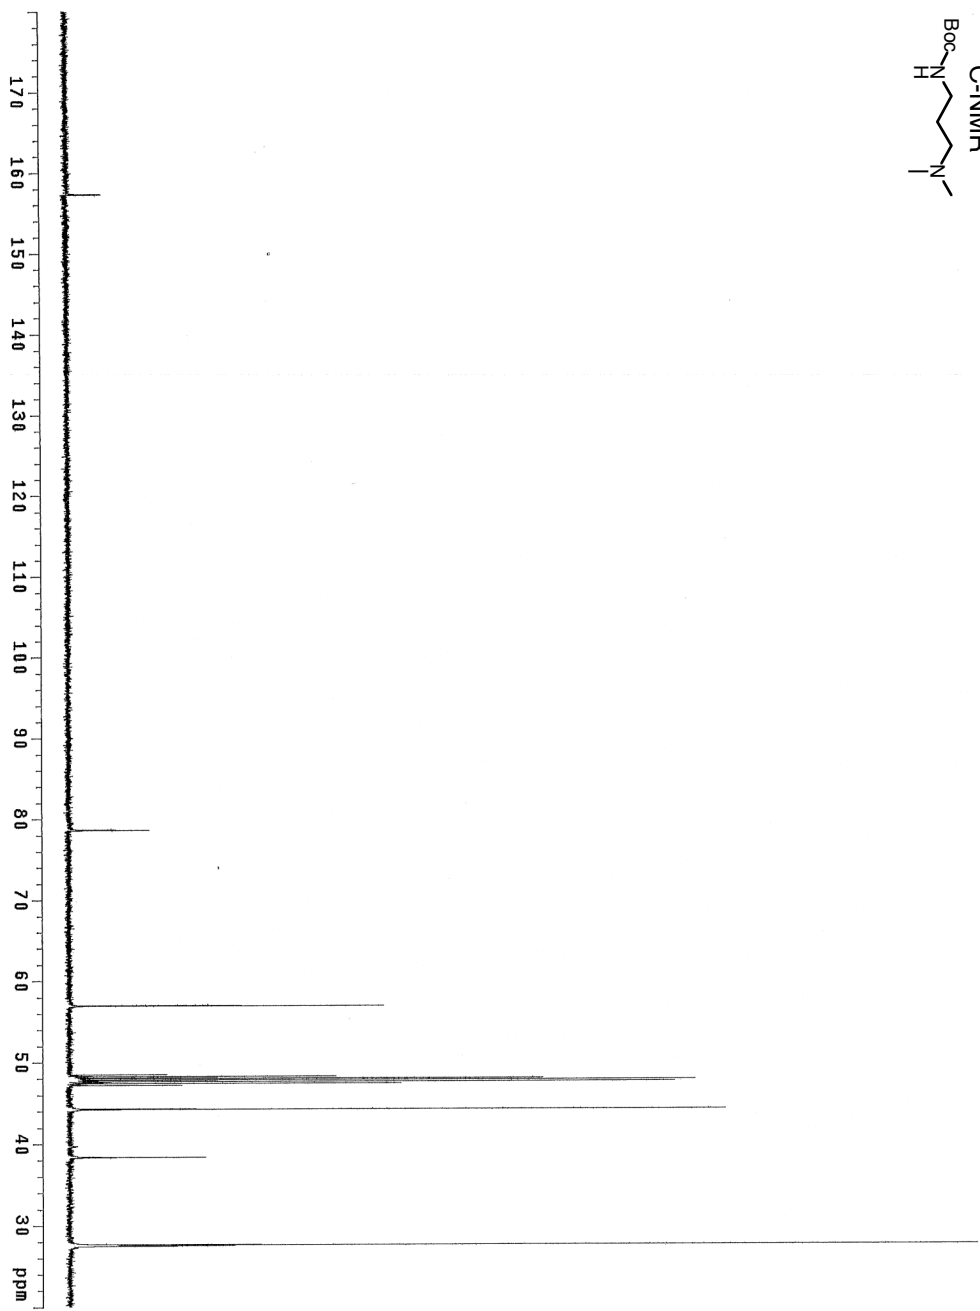

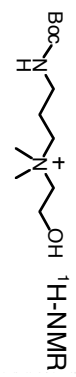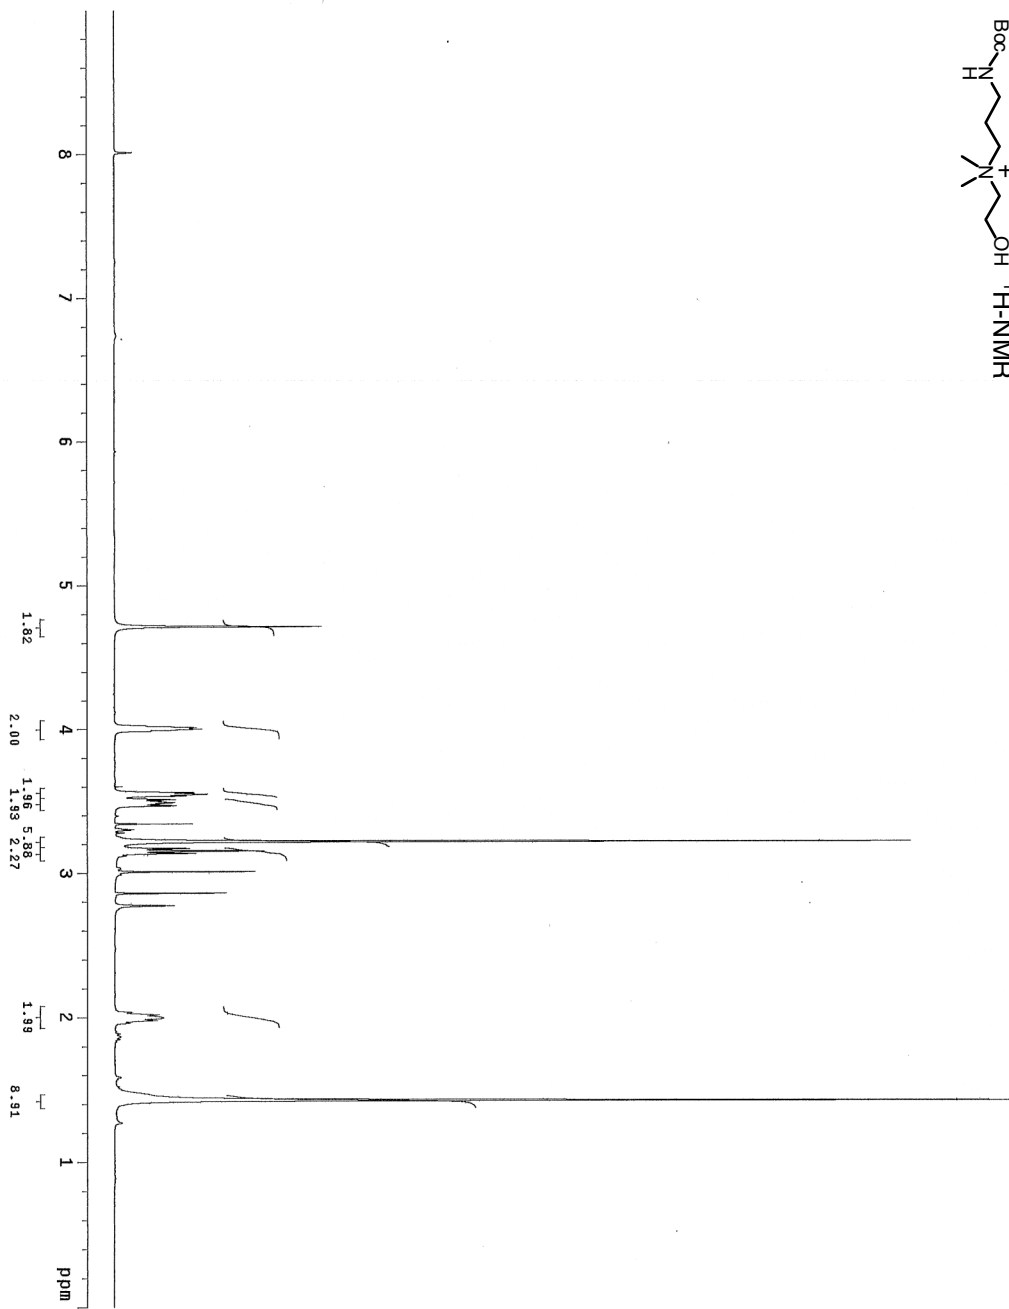

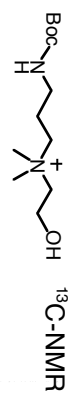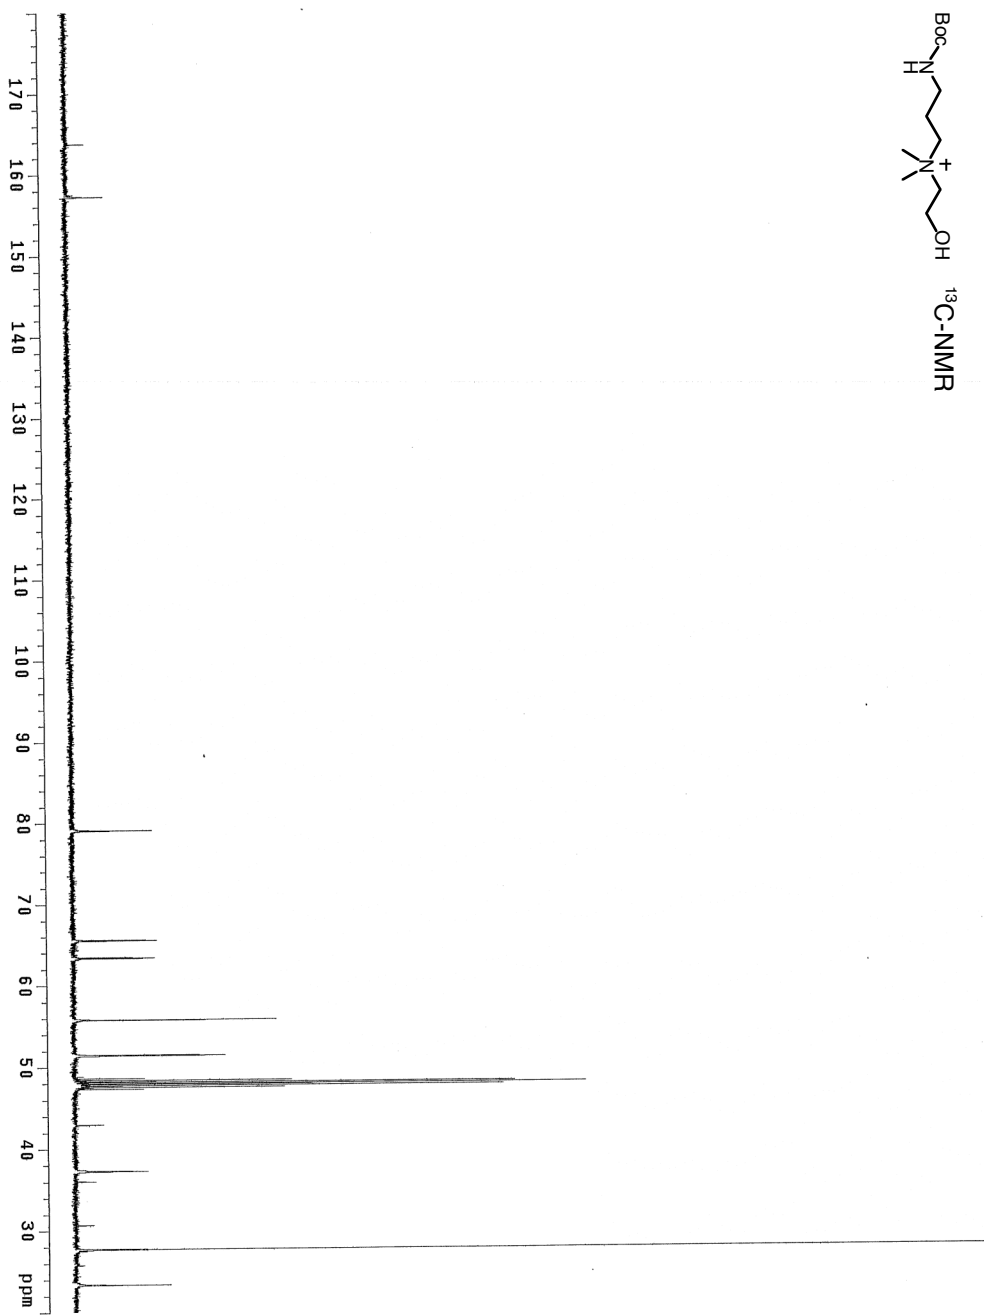

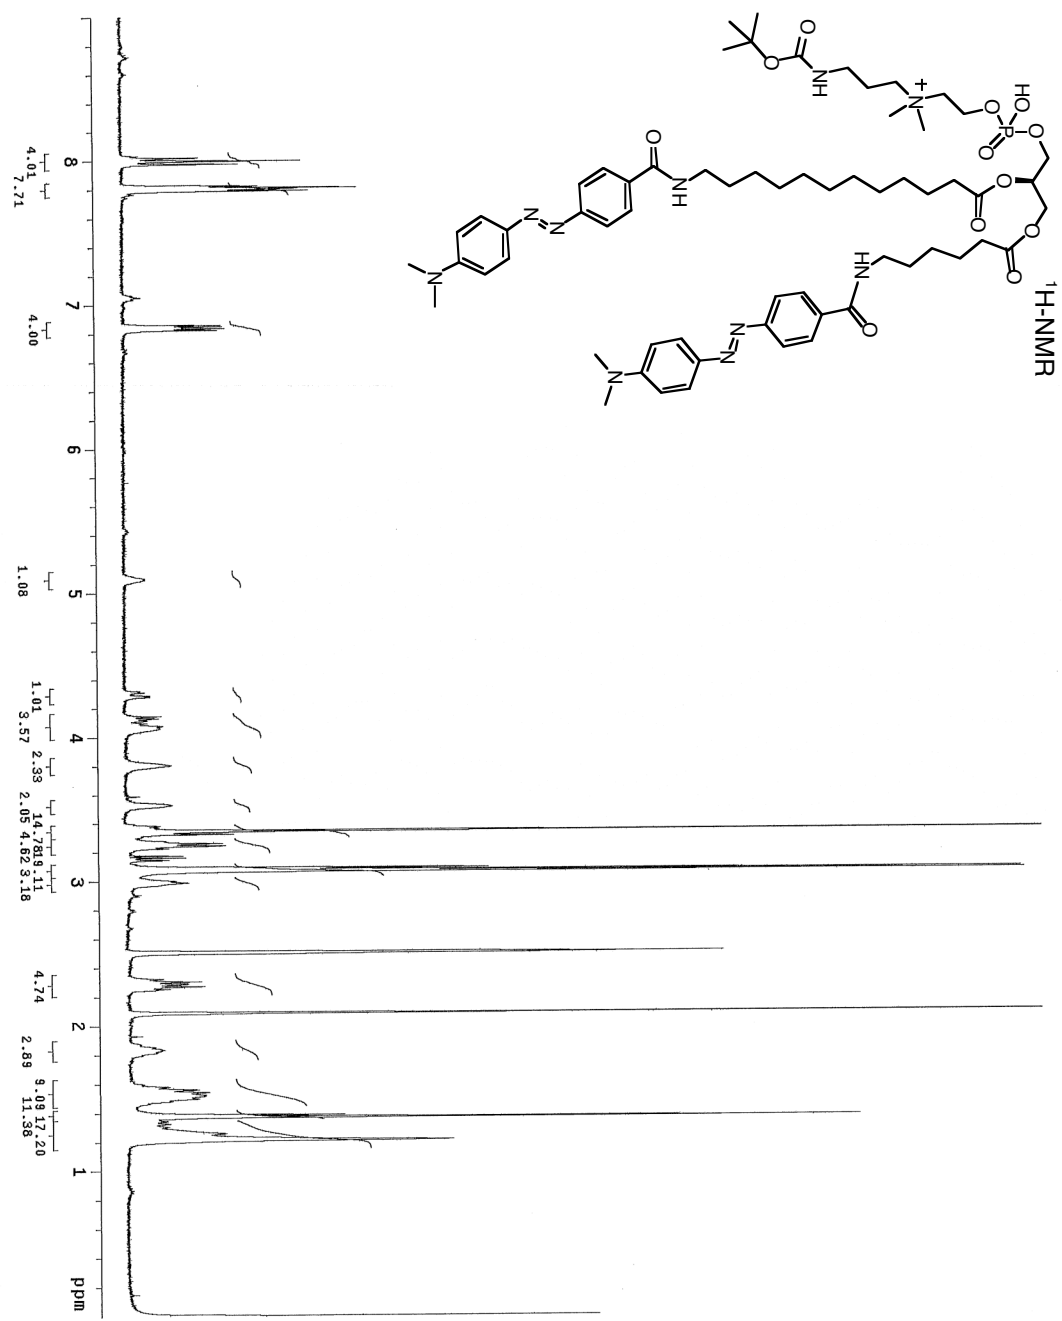



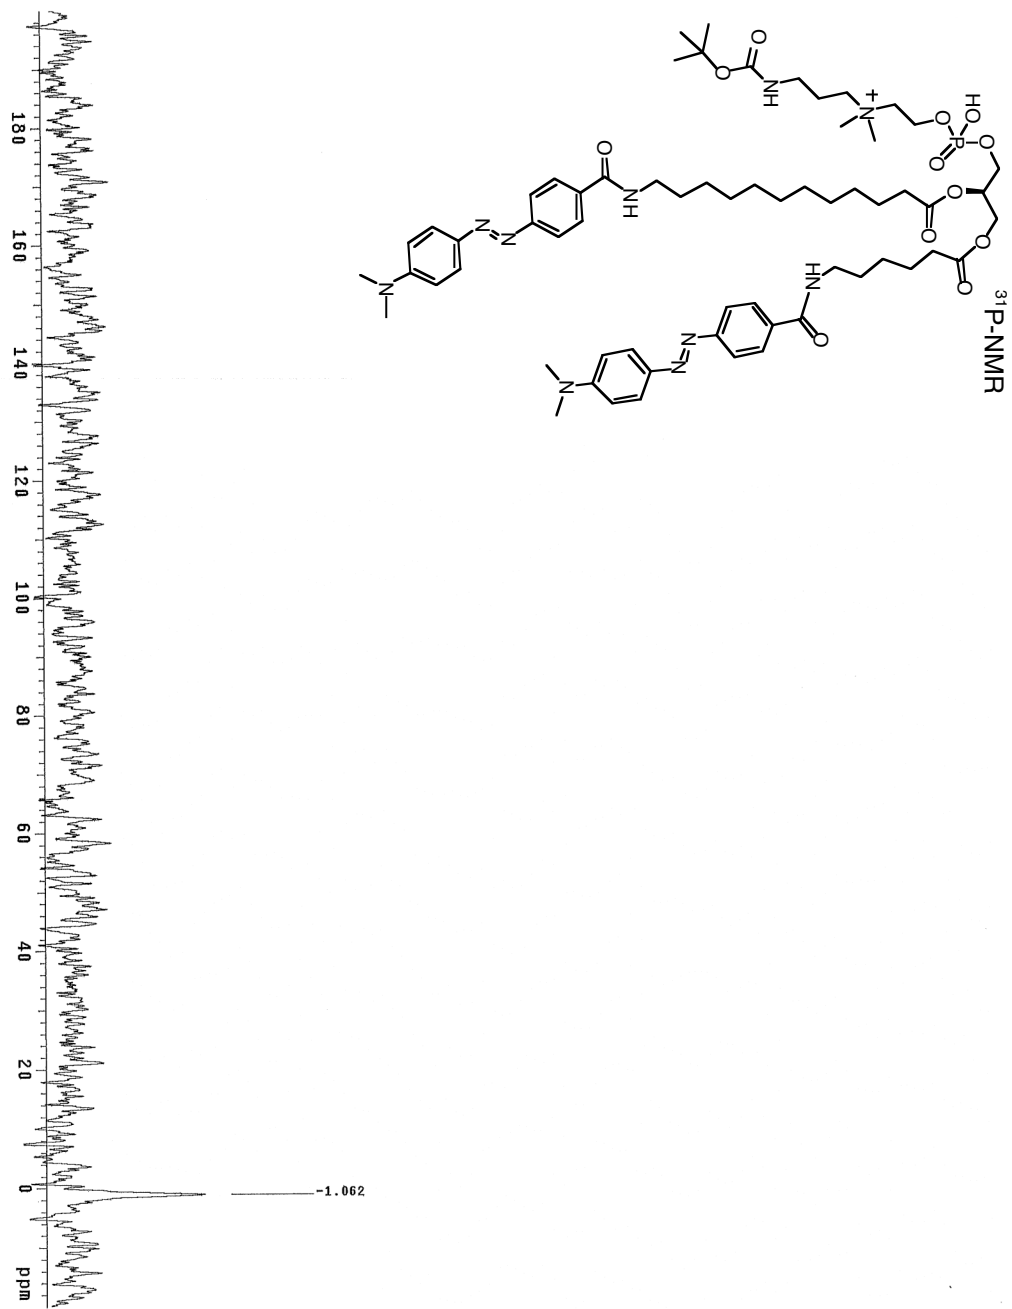

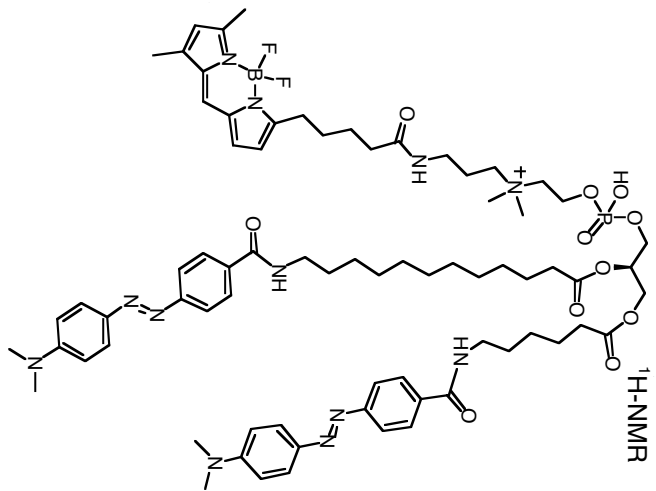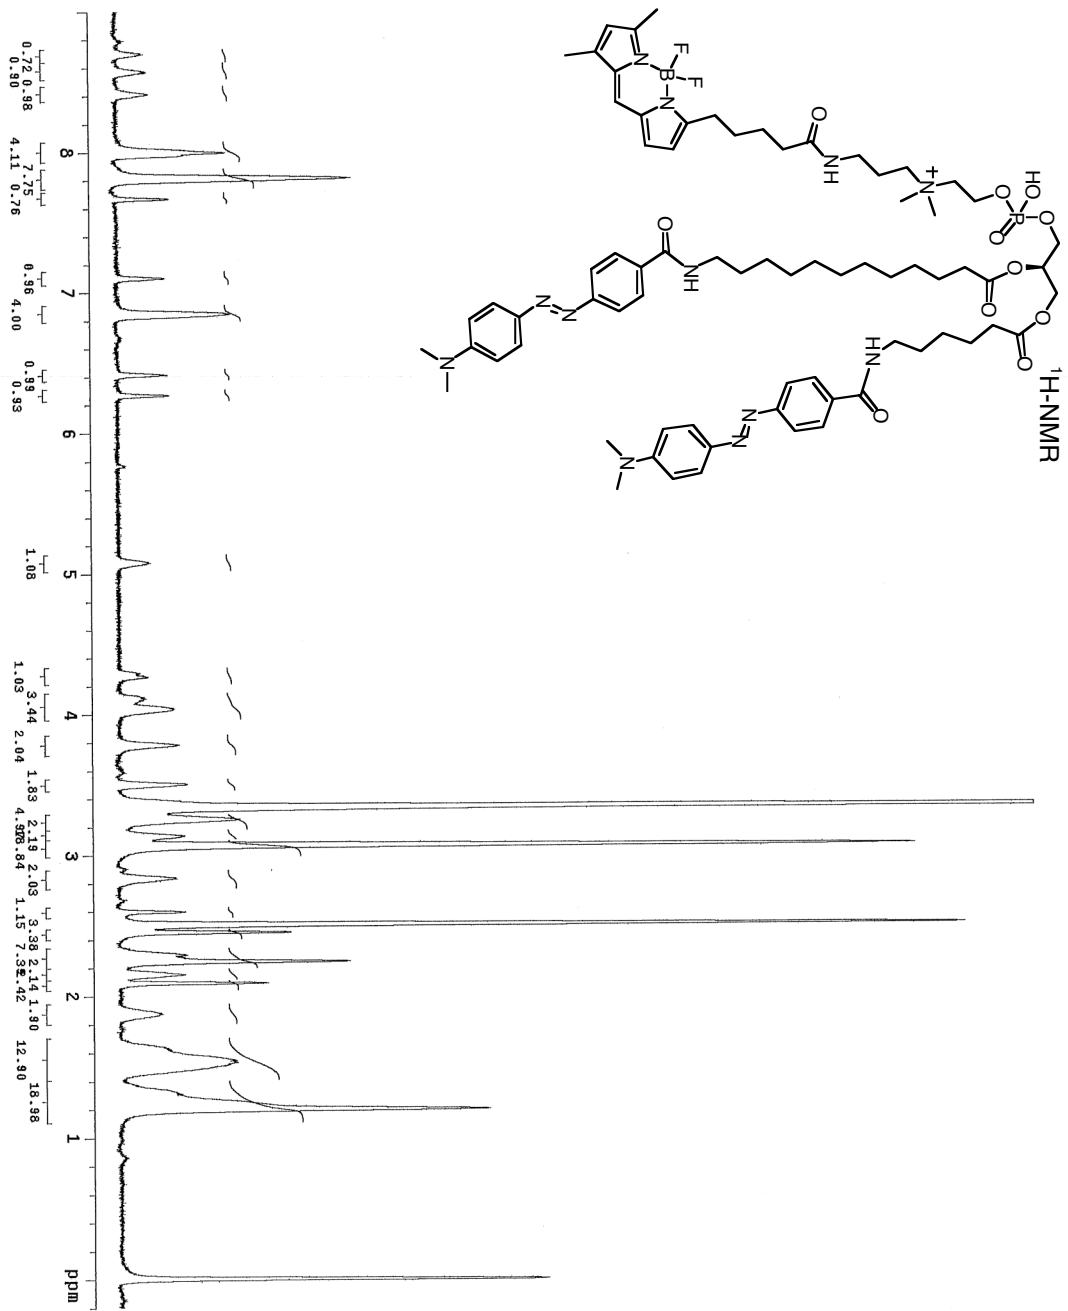

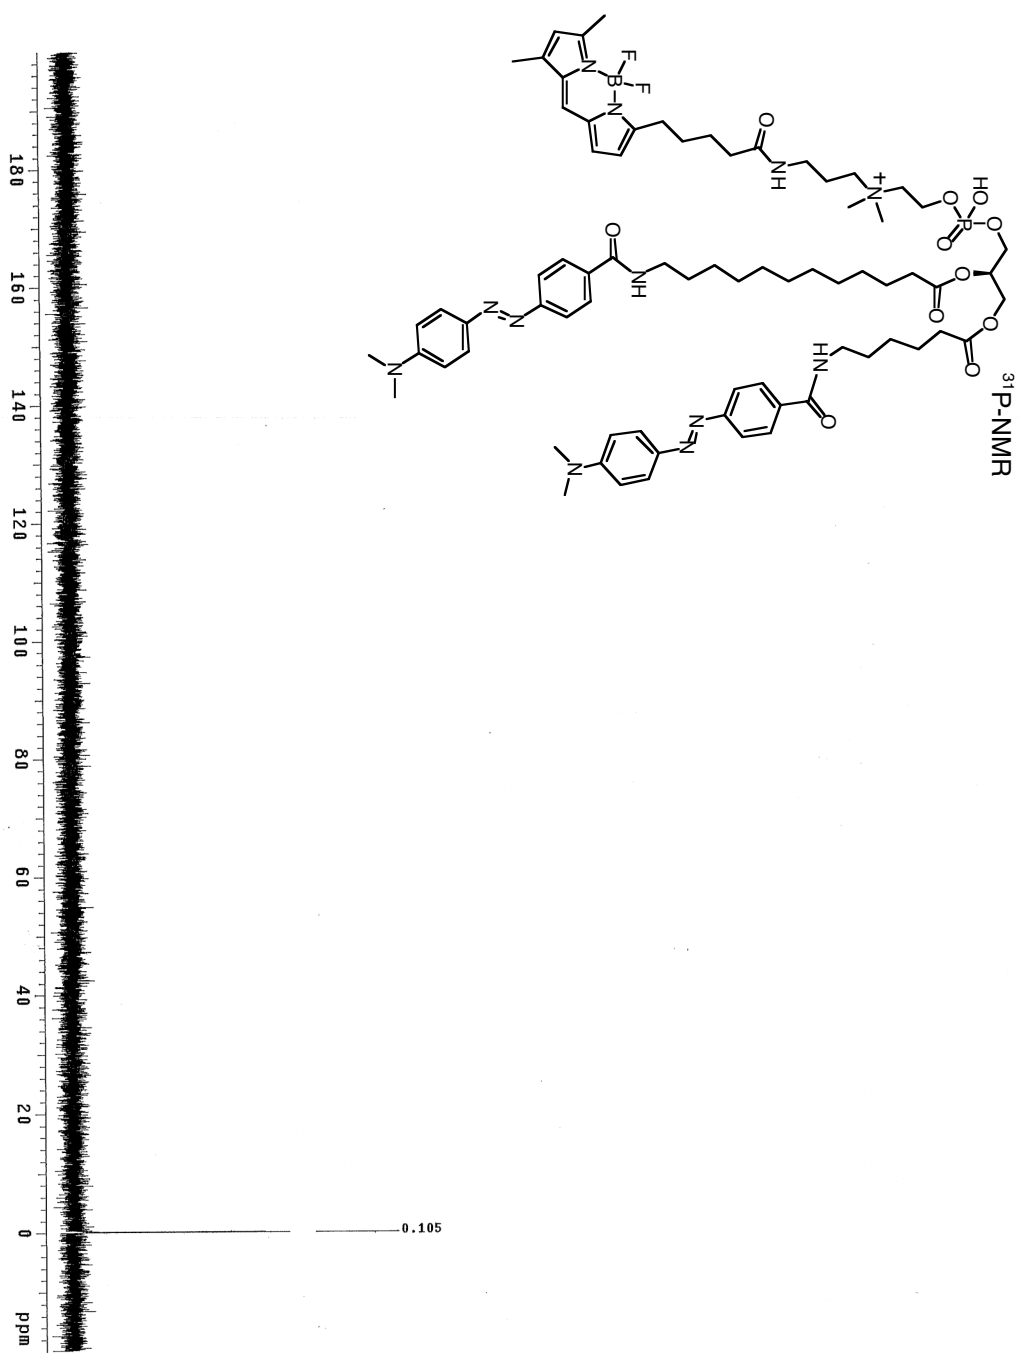

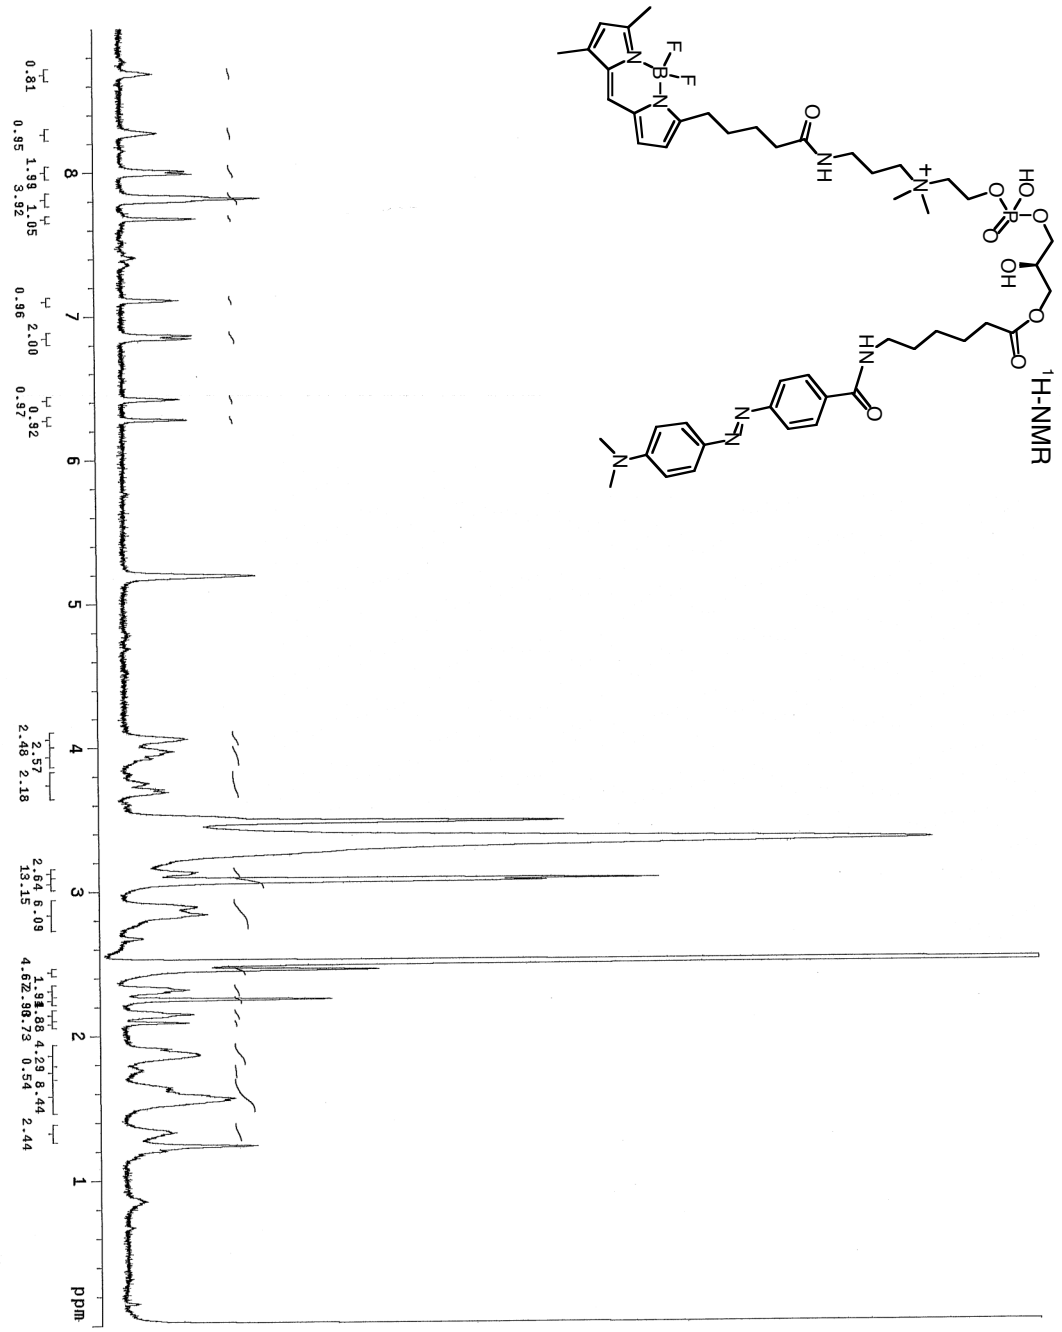

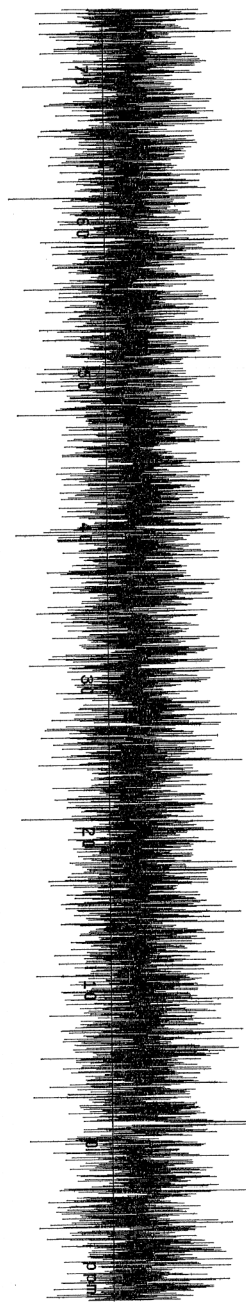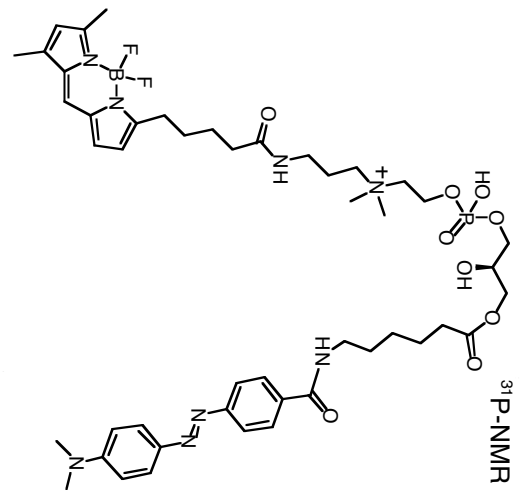

1.306
